# Supplementary material for: Sulfate as an Alternative Electron Acceptor: A Potential Strategy to Mitigate N2O Emissions in Upland Arable Soils
Source: Research Square preprint supplement (doi:10.21203/rs.3.rs-4789103/v1), 2024-07-25
Supplement: Supplementary file 2 [file aa9b42cc891cb3a95c236c69.xlsx]

## Sheet: Supple_Table_2
Supplementary Table 2.
							Pairwise-comparison
	Relative abundance			Global test			Log fold change			W-statistics			Standard error			P-value			Adjusted P-value
Item1	CON	MS	ZVM	W-statistics	Global P-value	Adjusted P-value	MS-CON	ZVM-CON	ZVM-MS	MS-CON	ZVM-CON	ZVM-MS	MS-CON	ZVM-CON	ZVM-MS	MS-CON	ZVM-CON	ZVM-MS	MS-CON	ZVM-CON	ZVM-MS
UCG_Gemmatimonadaceae	5.81545	3.87572	4.17528	2.76859	0.501002	1	-0.334643	-0.235358	0.099285	-1.52033	-1.08654	0.381244	0.220112	0.216611	0.260424	1	1	1	1	1	1
Sphingomonas	5.42181	4.15954	3.95548	1.92489	0.763917	1	-0.191075	-0.211729	-0.0206539	-1.01761	-1.14938	-0.0893019	0.187768	0.18421	0.231282	1	1	1	1	1	1
Bacillus	4.08735	3.99008	3.63071	0.267377	0.250275	1	0.063339	-0.0171171	-0.0804562	0.497247	-0.137701	-0.453943	0.127379	0.124307	0.177238	1	1	1	1	1	1
UCG_Chitinophagaceae	2.56646	3.15022	2.84094	0.377896	0.344341	1	0.219254	0.157527	-0.0617274	0.581113	0.421085	-0.151234	0.3773	0.374097	0.408159	1	1	1	1	1	1
UG_Micrococcaceae	3.12974	1.98863	2.24937	4.37357	0.224555	1	-0.378083	-0.224476	0.153607	-1.95715	-1.18376	0.650554	0.19318	0.189629	0.236117	1	1	1	1	1	1
Clostridium_sensu_stricto_1	1.6315	2.87625	1.35648	3.16044	0.411859	1	0.564231	-0.0627617	-0.626993	1.54729	-0.173646	-1.5832	0.364658	0.361436	0.396029	1	1	1	1	1	1
JG30-KF-CM45	1.9811	1.88503	1.74698	0.0622231	0.0612651	1	0.0289236	-0.0251626	-0.0540861	0.168513	-0.149711	-0.249281	0.17164	0.168074	0.216969	1	1	1	1	1	1
KD4-96	1.67384	1.56238	1.79073	1.1303	0.863449	1	0.0078777	0.171821	0.163943	0.0473307	1.05491	0.771936	0.16644	0.162877	0.212379	1	1	1	1	1	1
UCG_Microscillaceae	0.133594	2.14649	2.33376	11.6244	0.00598181	1	2.54643	2.50707	-0.0393521	2.94352	2.90762	-0.0443705	0.865095	0.862242	0.886898	1	1	1	1	1	1
Luteimonas	1.0759	1.68764	1.73549	15.1045	0.00104987	0.605774	0.526587	0.581189	0.0546024	2.84856	3.20568	0.23876	0.184861	0.1813	0.228691	0.00439171	0.00134742	0.811292	0.167446	0.0527214	1
UCG_Vicinamibacterales	1.6337	1.35589	1.35236	0.778898	0.64514	1	-0.10966	-0.0895946	0.0200658	-0.716152	-0.598903	0.0999987	0.153124	0.149598	0.20066	1	1	1	1	1	1
UG_Microbacteriaceae	1.50614	1.15672	1.35085	0.690032	0.583582	1	-0.184907	-0.00702106	0.177886	-0.79998	-0.0308396	0.657645	0.23114	0.227664	0.27049	1	1	1	1	1	1
Longimicrobiaceae	0.884287	1.56555	1.52329	10.8571	0.00877913	1	0.65035	0.632278	-0.0180724	2.69333	2.65648	-0.0645512	0.241467	0.238013	0.279971	1	1	1	1	1	1
Vicinamibacteraceae	1.35061	1.31771	1.26774	0.131695	0.127453	1	0.0500406	0.0379121	-0.0121285	0.307572	0.238233	-0.0580083	0.162696	0.159139	0.209082	1	1	1	1	1	1
UG_Intrasporangiaceae	1.34178	1.02885	1.0955	0.486819	0.432099	1	-0.206162	-0.138556	0.0676061	-0.66351	-0.450732	0.196155	0.310715	0.307403	0.344656	1	1	1	1	1	1
SC-I-84	1.1648	1.09265	1.07863	0.0226516	0.0225238	1	0.016722	0.0230787	0.00635674	0.0947196	0.133422	0.0287239	0.176542	0.172976	0.221305	1	1	1	1	1	1
Lysobacter	0.910848	1.07877	1.09818	0.629025	0.53971	1	0.170036	0.237299	0.0672627	0.530522	0.748074	0.190045	0.320507	0.317213	0.35393	1	1	1	1	1	1
Bryobacter	1.10351	0.953417	1.01326	0.166146	0.159432	1	-0.0865628	0.0122912	0.098854	-0.367702	0.0529912	0.360244	0.235415	0.231948	0.274409	1	1	1	1	1	1
UCG_Roseiflexaceae	1.23616	0.948394	0.734724	3.55698	0.337786	1	-0.198239	-0.418253	-0.220015	-0.867334	-1.85825	-0.82055	0.228561	0.225079	0.268131	1	1	1	1	1	1
Steroidobacter	1.10381	0.808554	0.75211	3.74958	0.306775	1	-0.230122	-0.292488	-0.0623663	-1.29136	-1.67484	-0.279951	0.178202	0.174636	0.222776	1	1	1	1	1	1
UG_Bacillaceae	0.548157	0.757452	1.24303	2.75617	0.504122	1	0.395847	0.824504	0.428658	0.791529	1.65882	0.813113	0.500103	0.497041	0.527181	1	1	1	1	1	1
UG_Micromonosporaceae	0.893873	0.848031	0.798214	0.0595231	0.0586461	1	0.0827115	0.0237286	-0.0589829	0.242392	0.0702088	-0.157862	0.341231	0.337972	0.373636	1	1	1	1	1	1
Gitt-GS-136	1.15995	0.663083	0.681274	13.2367	0.00267123	1	-0.48098	-0.428662	0.0523178	-2.90306	-2.64412	0.24712	0.16568	0.162119	0.21171	0.0036954	0.00819025	0.804816	0.144592	0.312275	1
UG_Sphingomonadaceae	0.483266	1.02409	0.996583	3.53451	0.341602	1	0.794876	0.694521	-0.100354	1.68614	1.48298	-0.201022	0.471417	0.468328	0.499222	1	1	1	1	1	1
C0119	0.776371	0.761806	0.802845	0.190738	0.181925	1	0.0381838	0.139927	0.101743	0.117039	0.433259	0.283109	0.326248	0.322964	0.359378	1	1	1	1	1	1
RB41	0.84211	0.75461	0.720929	0.221781	0.209926	1	-0.0321442	-0.0555521	-0.0234078	-0.236104	-0.418339	-0.126146	0.136144	0.132792	0.185561	1	1	1	1	1	1
Devosia	0.647771	0.752507	0.907013	5.64337	0.119011	1	0.227038	0.444301	0.217263	1.15293	2.29759	0.907268	0.196922	0.193377	0.239469	1	1	1	1	1	1
Flavisolibacter	0.864326	0.78903	0.63992	0.438254	0.393561	1	-0.0811295	-0.218074	-0.136944	-0.243792	-0.661814	-0.374585	0.332782	0.329509	0.365589	1	1	1	1	1	1
Gaiella	0.715821	0.699264	0.782224	1.19648	0.900446	1	0.075505	0.213136	0.137631	0.378767	1.08852	0.569559	0.199344	0.195804	0.241644	1	1	1	1	1	1
Acidibacter	0.533353	0.831491	0.774701	7.57942	0.0452043	1	0.508558	0.480892	-0.027666	2.26023	2.17094	-0.104447	0.225003	0.221513	0.264881	1	1	1	1	1	1
UCG_Methyloligellaceae	0.684286	0.735107	0.635946	0.84733	0.690714	1	0.149767	0.0176687	-0.132098	0.919901	0.11095	-0.631504	0.162807	0.15925	0.20918	1	1	1	1	1	1
67-14	0.685672	0.703422	0.593283	0.514938	0.453989	1	0.100318	-0.0542594	-0.154577	0.570376	-0.314888	-0.700336	0.17588	0.172313	0.220719	1	1	1	1	1	1
Haliangium	0.550396	0.689205	0.663278	5.52031	0.126564	1	0.294945	0.287706	-0.0072393	1.79346	1.78815	-0.0343695	0.164456	0.160896	0.210631	1	1	1	1	1	1
UG_Alphaproteobacteria	0.354758	0.743226	0.781247	7.85124	0.0394598	1	0.761362	0.83783	0.0764678	2.21111	2.45639	0.20305	0.344335	0.341081	0.376596	1	1	1	1	1	1
Agromyces	0.571754	0.578119	0.70505	6.4754	0.0785081	1	0.089561	0.303459	0.213898	0.705586	2.44954	1.21	0.126931	0.123884	0.176775	1	1	1	1	1	1
WD2101_soil_group	0.712893	0.575496	0.544906	2.03597	0.722644	1	-0.141869	-0.171371	-0.0295011	-0.943956	-1.16753	-0.148871	0.150292	0.146781	0.198166	1	1	1	1	1	1
UG_Gemmatimonadaceae	0.180828	0.831187	0.806886	97.835	1.13873e-21	6.94624e-19	1.60991	1.6057	-0.00421167	7.80936	7.92456	-0.0169981	0.206151	0.202623	0.247773	5.74803e-15	2.28954e-15	0.986438	2.19159e-13	8.95843e-14	1
Gemmatimonas	0.629912	0.573483	0.566285	0.00203492	0.00203388	1	-0.00670758	0.00255947	0.00926705	-0.0389133	0.0151622	0.0425845	0.172372	0.168806	0.217616	0.968959	0.987903	0.966033	1	1	1
UCG_Xanthobacteraceae	0.558936	0.573954	0.576548	0.440522	0.395381	1	0.106691	0.136353	0.0296624	0.459737	0.596483	0.109318	0.23207	0.228595	0.271341	1	1	1	1	1	1
UG_Nocardioidaceae	0.511399	0.56387	0.598446	1.71867	0.846886	1	0.180009	0.266948	0.0869392	0.810945	1.22185	0.331677	0.221975	0.218478	0.26212	1	1	1	1	1	1
UCG_Fodinicurvataceae	0.482476	0.607993	0.565574	7.26248	0.0529667	1	0.312932	0.250946	-0.0619866	2.1674	1.78082	-0.321269	0.144382	0.140916	0.192943	1	1	1	1	1	1
Limnobacter	0.781698	0.412893	0.385504	12.4013	0.00405629	1	-0.57707	-0.674594	-0.0975244	-2.57363	-3.05616	-0.369173	0.224224	0.220733	0.26417	1	1	1	1	1	1
Nocardioides	0.684203	0.392614	0.495055	3.01407	0.443132	1	-0.470156	-0.239423	0.230733	-1.71025	-0.881781	0.741936	0.274904	0.271522	0.310987	1	1	1	1	1	1
Skermanella	1.04307	0.254433	0.251899	45.4998	2.63563e-10	1.58401e-07	-1.3414	-1.33748	0.00392063	-5.45608	-5.51743	0.0138044	0.245854	0.24241	0.284013	4.86747e-08	3.43988e-08	0.988986	1.85585e-06	1.34595e-06	1
Pedobacter	0.533883	0.52121	0.477151	0.0670705	0.0659584	1	0.0483219	-0.00975977	-0.0580817	0.232367	-0.0477413	-0.232884	0.207956	0.204431	0.249402	1	1	1	1	1	1
Romboutsia	0.502318	0.644009	0.356386	2.04033	0.721072	1	0.292047	-0.232196	-0.524243	0.871552	-0.699765	-1.42541	0.335089	0.33182	0.367785	1	1	1	1	1	1
Hyphomicrobium	0.490645	0.533266	0.477216	1.06092	0.823332	1	0.170216	0.087096	-0.0831195	0.976238	0.509954	-0.378898	0.174359	0.170792	0.219372	1	1	1	1	1	1
Rhodanobacter	0.150563	0.427715	0.920032	8.60373	0.0270866	1	1.03235	1.7174	0.685054	1.73192	2.89571	1.10282	0.59607	0.593085	0.621183	1	1	1	1	1	1
Mycobacterium	0.448214	0.478633	0.556812	2.52429	0.566094	1	0.128194	0.319798	0.191604	0.620566	1.57499	0.772111	0.206575	0.203048	0.248156	1	1	1	1	1	1
Candidatus_Udaeobacter	0.599561	0.444257	0.429871	1.97844	0.743734	1	-0.208648	-0.216162	-0.00751356	-1.07722	-1.13684	-0.0317596	0.193692	0.190142	0.236576	1	1	1	1	1	1
Pseudomonas	0.301132	0.193854	0.930223	2.80484	0.492002	1	-0.388213	0.987515	1.37573	-0.469032	1.19724	1.61883	0.827689	0.824823	0.84983	1	1	1	1	1	1
Tumebacillus	0.608492	0.393702	0.40853	2.78628	0.496588	1	-0.415064	-0.298372	0.116692	-1.54621	-1.12575	0.382651	0.26844	0.265044	0.304956	1	1	1	1	1	1
Brevundimonas	0.226926	0.528968	0.595136	11.4865	0.00640879	1	0.876987	1.0737	0.196717	2.50347	3.09367	0.514563	0.350309	0.347065	0.3823	1	1	1	1	1	1
Saccharomonospora	0.22285	0.387585	0.724077	3.19875	0.404045	1	0.573904	1.11611	0.542207	0.913613	1.78519	0.830651	0.62817	0.625206	0.65275	1	1	1	1	1	1
Allorhizobium-Neorhizobium-Pararhizobium-Rhizobium	0.348577	0.412423	0.555704	2.91849	0.464823	1	0.24825	0.560337	0.312087	0.748354	1.70599	0.856001	0.331728	0.328454	0.364587	1	1	1	1	1	1
Altererythrobacter	0.325849	0.509915	0.476334	1.55056	0.921148	1	0.429485	0.378256	-0.0512286	1.10444	0.980738	-0.12218	0.388873	0.385685	0.419287	1	1	1	1	1	1
UG_Xanthobacteraceae	0.331695	0.466938	0.502138	8.41738	0.0297317	1	0.446248	0.497791	0.0515434	2.1558	2.44648	0.207386	0.206999	0.203472	0.248538	1	1	1	1	1	1
UG_Myxococcaceae	0.434917	0.423982	0.438633	0.605964	0.522775	1	0.0811551	0.131309	0.0501535	0.438756	0.72384	0.219216	0.184966	0.181406	0.228786	1	1	1	1	1	1
Streptomyces	0.403489	0.458444	0.425459	1.29722	0.954458	1	0.221833	0.170417	-0.0514159	1.01252	0.790478	-0.198139	0.21909	0.215588	0.259494	1	1	1	1	1	1
UG_Rhizobiaceae	0.378342	0.467002	0.437516	4.37312	0.224604	1	0.307032	0.273382	-0.0336498	1.70096	1.54505	-0.149675	0.180505	0.176941	0.22482	1	1	1	1	1	1
Terrisporobacter	0.324925	0.61617	0.333334	3.14443	0.415169	1	0.634602	0.144193	-0.490409	1.74139	0.399205	-1.23902	0.364423	0.3612	0.395804	1	1	1	1	1	1
Turicibacter	0.405076	0.520519	0.316249	1.07332	0.830604	1	0.270654	-0.132249	-0.402904	0.738724	-0.364162	-1.01313	0.366381	0.363161	0.39768	1	1	1	1	1	1
UCG_Gaiellales	0.389213	0.397413	0.432366	1.31038	0.961311	1	0.105023	0.192012	0.086989	0.582006	1.08551	0.387012	0.18045	0.176886	0.224771	1	1	1	1	1	1
YM_S32_TM7_50_20	0.737611	0.212305	0.191304	8.91293	0.0232066	1	-1.34388	-1.35156	-0.0076725	-2.52407	-2.55302	-0.013731	0.532429	0.529395	0.558772	1	1	1	1	1	1
AKYG1722	0.166727	0.507375	0.465667	36.987	1.85956e-08	1.11016e-05	1.18746	1.14098	-0.0464824	4.99073	4.86617	-0.167976	0.237933	0.234471	0.27672	6.01505e-07	1.13782e-06	0.866602	2.35355e-05	4.33824e-05	1
Adhaeribacter	0.488544	0.327843	0.319641	2.17968	0.67254	1	-0.326783	-0.315797	0.0109862	-1.22364	-1.19775	0.0361783	0.267058	0.263659	0.303669	1	1	1	1	1	1
Pedomicrobium	0.408169	0.302664	0.417275	3.4264	0.360576	1	-0.215024	0.131837	0.346861	-1.512	0.950052	1.81588	0.142211	0.138768	0.191015	1	1	1	1	1	1
Nannocystis	0.302973	0.472699	0.333896	12.2728	0.00432547	1	0.528217	0.206911	-0.321306	3.38198	1.35549	-1.58003	0.156186	0.152647	0.203354	1	1	1	1	1	1
Chthoniobacter	0.348983	0.394407	0.357139	1.58936	0.90345	1	0.20895	0.122648	-0.0863014	1.16922	0.700277	-0.386613	0.178708	0.175142	0.223224	1	1	1	1	1	1
JG30-KF-CM66	0.655274	0.24381	0.191126	21.8192	3.65633e-05	0.0216089	-0.94799	-1.15256	-0.204571	-3.40893	-4.19548	-0.65157	0.27809	0.274715	0.313966	0.000652189	2.72295e-05	0.514679	0.0248664	0.00106543	1
MND1	0.358282	0.347036	0.370626	0.48493	0.430618	1	0.0372677	0.131351	0.0940829	0.193757	0.695747	0.399727	0.192343	0.188791	0.235368	1	1	1	1	1	1
IMCC26256	0.333042	0.337073	0.403711	2.97478	0.451923	1	0.084477	0.293619	0.209142	0.484091	1.71767	0.952797	0.174507	0.17094	0.219503	1	1	1	1	1	1
UCG_Actinomarinales	0.28802	0.28647	0.474575	11.4232	0.00661469	1	0.0751625	0.602706	0.527544	0.411441	3.36485	2.32652	0.182681	0.179118	0.226753	1	1	1	1	1	1
UCG_Planctomycetales	0.42274	0.321491	0.302394	1.03175	0.806047	1	-0.223792	-0.245996	-0.0222038	-0.790368	-0.879236	-0.0696697	0.283149	0.279783	0.318702	1	1	1	1	1	1
TRA3-20	0.359781	0.325577	0.327777	0.0679583	0.0668167	1	-0.0378146	-0.0427138	-0.00489916	-0.190899	-0.219558	-0.0203694	0.198087	0.194544	0.240516	1	1	1	1	1	1
Chryseolinea	0.147911	0.461991	0.392251	1.05829	0.821784	1	0.784788	0.71525	-0.0695381	0.91951	0.840849	-0.0794368	0.853484	0.850628	0.875389	1	1	1	1	1	1
Microvirga	0.336609	0.312832	0.339112	0.359522	0.32906	1	0.0181454	0.153278	0.135132	0.0680993	0.582685	0.445825	0.266454	0.263054	0.303106	1	1	1	1	1	1
Novibacillus	0.349646	0.352251	0.285047	0.331341	0.305349	1	0.0461589	-0.105457	-0.151616	0.195611	-0.453565	-0.55149	0.235973	0.232507	0.27492	1	1	1	1	1	1
UG_Blastocatellaceae	0.236655	0.378683	0.368764	6.99981	0.0604005	1	0.535883	0.457064	-0.0788195	2.2838	1.97712	-0.287975	0.234645	0.231176	0.273702	1	1	1	1	1	1
UG_Woeseiaceae	0.263492	0.329588	0.350251	6.17458	0.0912509	1	0.33778	0.415097	0.0773166	1.72394	2.15759	0.324063	0.195936	0.192389	0.238585	1	1	1	1	1	1
Terrabacter	0.356771	0.279125	0.294483	0.879941	0.711889	1	-0.151804	-0.0743225	0.0774812	-0.892004	-0.446068	0.359239	0.170183	0.166617	0.215681	1	1	1	1	1	1
bacteriap25	0.394786	0.264582	0.252577	6.9753	0.0611454	1	-0.325277	-0.353109	-0.0278319	-1.91861	-2.12751	-0.129383	0.169538	0.165973	0.215112	1	1	1	1	1	1
S0134_terrestrial_group	0.214445	0.311113	0.37542	19.4133	0.000121752	0.0715904	0.433705	0.646888	0.213182	2.59352	3.95255	1.00051	0.167227	0.163663	0.213074	0.00950003	7.73222e-05	0.317064	0.362214	0.00302544	1
CCD24	0.328967	0.324562	0.245512	1.6141	0.892344	1	0.0681343	-0.189604	-0.257738	0.39119	-1.11136	-1.17578	0.174172	0.170605	0.219207	1	1	1	1	1	1
AKAU4049	0.46931	0.198524	0.211116	16.7072	0.000471096	0.27512	-0.775693	-0.702654	0.0730392	-3.42509	-3.1511	0.274354	0.226473	0.222987	0.266223	0.000614588	0.00162658	0.783813	0.0240474	0.0620177	1
Methyloligellaceae	0.285108	0.287581	0.298926	0.840895	0.686494	1	0.0846525	0.13847	0.0538172	0.503797	0.841941	0.25174	0.168029	0.164465	0.213781	1	1	1	1	1	1
Oceanobacillus	0.313728	0.27596	0.256735	0.11522	0.111964	1	0.169903	0.109376	-0.0605275	0.330947	0.214322	-0.112057	0.513385	0.510335	0.540151	1	1	1	1	1	1
BIyi10	0.20183	0.313067	0.321374	14.3473	0.00153304	0.879967	0.516844	0.543204	0.0263593	2.84369	3.04849	0.116672	0.181751	0.178188	0.225926	0.00445944	0.00229993	0.90712	0.170028	0.089991	1
Blastococcus	0.294538	0.272461	0.236983	1.01143	0.793853	1	0.00629599	-0.136461	-0.142757	0.0449931	-0.999581	-0.75541	0.139932	0.136518	0.188979	1	1	1	1	1	1
UCG_Caldilineaceae	0.277332	0.251017	0.269915	0.218843	0.207295	1	-0.0329495	0.0770838	0.110033	-0.160283	0.381524	0.445028	0.205571	0.202042	0.24725	1	1	1	1	1	1
Bradyrhizobium	0.272792	0.27542	0.243872	0.355086	0.32535	1	0.112988	-0.000243505	-0.113231	0.577487	-0.00126755	-0.475097	0.195654	0.192108	0.238333	1	1	1	1	1	1
UG_Sphingobacteriaceae	0.311548	0.218152	0.25771	1.58695	0.904542	1	-0.32125	-0.126037	0.195213	-1.25688	-0.49981	0.666215	0.255593	0.25217	0.293018	1	1	1	1	1	1
Limnochordaceae	0.198254	0.253942	0.329809	8.58432	0.0273507	1	0.295192	0.614279	0.319087	1.35921	2.87485	1.23793	0.217179	0.213673	0.257758	1	1	1	1	1	1
Cellvibrio	0.172993	0.196841	0.408775	1.60402	0.896852	1	0.179963	0.740706	0.560743	0.297762	1.23162	0.89098	0.604386	0.601406	0.629355	1	1	1	1	1	1
MB-A2-108	0.260141	0.205396	0.301743	1.70396	0.853138	1	-0.197757	0.25122	0.448978	-0.634883	0.815185	1.29993	0.311486	0.308176	0.345386	1	1	1	1	1	1
Rhizobacter	0.21868	0.28294	0.258694	2.54594	0.559999	1	0.299587	0.234326	-0.0652609	1.40477	1.11717	-0.256725	0.213264	0.209749	0.254205	1	1	1	1	1	1
Hydrogenispora	0.282658	0.250428	0.220032	0.492079	0.436217	1	-0.0466968	-0.136315	-0.0896183	-0.235098	-0.698748	-0.37186	0.198627	0.195085	0.241	1	1	1	1	1	1
Ureibacillus	0.184395	0.261107	0.294557	9.50978	0.017219	1	0.42896	0.511081	0.082121	2.18302	2.64873	0.343473	0.196498	0.192953	0.23909	1	1	1	1	1	1
Actinomadura	0.306185	0.20147	0.228027	0.424258	0.382279	1	-0.248622	-0.0600384	0.188583	-0.640246	-0.15589	0.450341	0.388322	0.385134	0.418757	1	1	1	1	1	1
Flavitalea	0.189732	0.295428	0.244342	19.5174	0.000115579	0.0680758	0.523943	0.362238	-0.161705	3.72021	2.63617	-0.852025	0.140837	0.137411	0.189789	0.000199057	0.00838474	0.3942	0.00778864	0.31969	1
Paenibacillus	0.242038	0.228433	0.245924	0.00987353	0.0098492	1	0.0202217	0.0392426	0.0190209	0.0505299	0.0988429	0.0442148	0.400192	0.39702	0.430193	1	1	1	1	1	1
UG_Hyphomicrobiaceae	0.237151	0.150011	0.310343	1.86315	0.787866	1	-0.542795	0.186124	0.728919	-1.02295	0.352788	1.30865	0.530616	0.52758	0.556998	1	1	1	1	1	1
UG_Bacteria	0.194751	0.225659	0.252824	0.675662	0.573368	1	0.194181	0.300955	0.106775	0.510096	0.797283	0.259538	0.380675	0.377476	0.411402	1	1	1	1	1	1
Latilactobacillus	0.258512	0.0990716	0.313614	1.88036	0.781115	1	1.68131	2.3937	0.712393	0.934494	1.33244	0.392074	1.79917	1.79648	1.81698	1	1	1	1	1	1
UCG_Anaerolineaceae	0.146082	0.320662	0.199831	8.54222	0.0279326	1	0.855368	0.388749	-0.46662	2.90837	1.337	-1.41834	0.294106	0.290763	0.32899	1	1	1	1	1	1
Mesorhizobium	0.123506	0.256458	0.281806	5.13058	0.153793	1	0.73536	0.988249	0.252889	1.58572	2.14538	0.514263	0.463739	0.460642	0.491751	1	1	1	1	1	1
Pseudarthrobacter	0.424834	0.133675	0.0776467	4.27319	0.236112	1	-2.14539	-3.35838	-1.21299	-1.29942	-2.03743	-0.72669	1.65104	1.64834	1.6692	1	1	1	1	1	1
Anseongella	0.00243161	0.349484	0.278984	16.0793	0.000644843	0.375299	4.02674	3.83151	-0.195232	3.52943	3.3665	-0.168177	1.1409	1.13813	1.16087	0.000416461	0.000761282	0.866444	0.0162952	0.0290259	1
UG_Gaiellales	0.15539	0.237865	0.235832	2.54175	0.561172	1	0.694794	0.647209	-0.0475849	1.39502	1.30752	-0.0906067	0.498054	0.49499	0.525181	1	1	1	1	1	1
Solirubrobacter	0.225588	0.187999	0.205754	0.37021	0.337966	1	-0.106416	0.0205853	0.127001	-0.555905	0.109569	0.541467	0.191428	0.187875	0.23455	1	1	1	1	1	1
Nitrosospira	0.243207	0.208204	0.166909	4.56646	0.203909	1	-0.0865246	-0.2828	-0.196275	-0.620788	-2.07983	-1.04134	0.139379	0.135972	0.188483	1	1	1	1	1	1
Herminiimonas	0.0542058	0.298552	0.264546	37.9718	1.13648e-08	6.80749e-06	1.79005	1.61462	-0.175425	5.36532	4.88745	-0.478782	0.333633	0.330361	0.366399	8.08051e-08	1.02153e-06	0.632094	3.16171e-06	3.89484e-05	1
Magnetospirillaceae	0.0467524	0.285059	0.280895	14.98	0.00111727	0.643549	1.82941	1.73777	-0.091633	3.36606	3.21535	-0.160873	0.543486	0.540462	0.569597	0.000762503	0.00130285	0.872193	0.029835	0.0496748	1
Pricia	0.0849599	0.24624	0.272116	70.2496	1.11305e-15	6.73396e-13	1.18025	1.28747	0.107217	6.21606	6.91013	0.459846	0.189871	0.186316	0.233159	5.09785e-10	4.84206e-12	0.645627	1.94369e-08	1.89458e-10	1
UCG_Microtrichales	0.186179	0.188993	0.225471	1.11661	0.855642	1	0.0907877	0.285769	0.194981	0.331294	1.05584	0.628607	0.274039	0.270655	0.31018	1	1	1	1	1	1
Truepera	0.148491	0.222504	0.219207	3.67576	0.318308	1	0.469522	0.480477	0.0109543	1.56027	1.61454	0.0326594	0.300924	0.297594	0.335411	1	1	1	1	1	1
UG_Comamonadaceae	0.255932	0.234762	0.098417	2.73478	0.509542	1	0.000375413	-1.70198	-1.70235	0.000318846	-1.44894	-1.42195	1.17741	1.17464	1.1972	1	1	1	1	1	1
Nitrospira	0.281737	0.172798	0.133029	15.8984	0.000705895	0.410125	-0.407384	-0.665127	-0.257743	-2.22736	-3.7088	-1.13569	0.1829	0.179337	0.226947	0.0259231	0.00020824	0.256084	0.988389	0.00814794	1
Dongia	0.163837	0.230047	0.183506	4.92418	0.170514	1	0.429271	0.225488	-0.203783	2.13227	1.14007	-0.83716	0.201321	0.197784	0.243422	1	1	1	1	1	1
UCG_Alphaproteobacteria	0.192638	0.160947	0.214248	1.19003	0.896892	1	-0.189181	0.212153	0.401334	-0.563606	0.638261	1.08961	0.335661	0.332393	0.368329	1	1	1	1	1	1
Pseudogracilibacillus	0.230096	0.171375	0.163364	0.607843	0.524162	1	-0.19928	-0.285685	-0.0864045	-0.515744	-0.745518	-0.207254	0.386394	0.383203	0.416901	1	1	1	1	1	1
UCG_Azospirillales	0.1923	0.184667	0.179882	0.0121356	0.0120988	1	-0.000861858	0.0255827	0.0264446	-0.00341581	0.10279	0.0911939	0.252314	0.248884	0.289982	1	1	1	1	1	1
Rokubacteriales	0.193876	0.180446	0.178003	0.0233309	0.0231954	1	0.0154954	0.0249793	0.00948395	0.085972	0.141388	0.0422294	0.180237	0.176673	0.224582	1	1	1	1	1	1
Saccharimonadales	0.151172	0.213417	0.179567	0.784435	0.648886	1	0.358925	0.20806	-0.150865	0.871712	0.509216	-0.341828	0.411747	0.408589	0.441346	1	1	1	1	1	1
UCG_Blastocatellaceae	0.237283	0.12862	0.177386	4.72863	0.188027	1	-0.530457	-0.240014	0.290443	-2.15277	-0.98786	1.02081	0.246407	0.242964	0.284523	1	1	1	1	1	1
Subgroup_5	0.216283	0.153129	0.159604	2.6644	0.527793	1	-0.277533	-0.225735	0.0517979	-1.40122	-1.16045	0.215379	0.198066	0.194523	0.240496	1	1	1	1	1	1
mle1-7	0.198742	0.165217	0.15491	0.351363	0.32223	1	-0.091797	-0.110532	-0.018735	-0.423271	-0.518034	-0.0727624	0.216875	0.213368	0.257482	1	1	1	1	1	1
Porphyrobacter	0.287266	0.144142	0.0852825	1.68891	0.859582	1	-1.77783	-1.93371	-0.155885	-1.07019	-1.16592	-0.0928248	1.66122	1.65852	1.67935	1	1	1	1	1	1
EPR3968-O8a-Bc78	0.139454	0.172558	0.189007	4.95977	0.167506	1	0.34455	0.438474	0.0939241	1.53999	1.99087	0.356145	0.223735	0.220243	0.263724	1	1	1	1	1	1
UCG_Desulfobacterota	0.152176	0.169868	0.176661	1.14552	0.872068	1	0.161374	0.244517	0.0831425	0.658036	1.01127	0.29333	0.245236	0.241791	0.283443	1	1	1	1	1	1
Rhodomicrobium	0.204727	0.149792	0.132257	4.26728	0.236811	1	-0.238326	-0.336451	-0.0981242	-1.29021	-1.85722	-0.429305	0.184719	0.181158	0.228566	1	1	1	1	1	1
Pir4_lineage	0.187312	0.156897	0.138186	0.685152	0.580122	1	-0.139034	-0.200593	-0.0615589	-0.531753	-0.777332	-0.206252	0.261464	0.258053	0.298465	1	1	1	1	1	1
UCG_Cyclobacteriaceae	0	0.235324	0.247042	14.4196	0.00147862	0.850209	4.04399	3.86017	-0.18382	3.33927	3.19477	-0.149366	1.21104	1.20828	1.23067	0.000839994	0.00139942	0.881265	0.032867	0.0533566	1
Tepidimicrobium	0.170605	0.171088	0.138661	0.198259	0.188749	1	0.0453578	-0.116441	-0.161799	0.130673	-0.338628	-0.426634	0.347111	0.343861	0.379245	1	1	1	1	1	1
Pseudolabrys	0.18006	0.188093	0.106577	1.69665	0.856264	1	0.168698	-1.27451	-1.44321	0.140838	-1.06649	-1.18538	1.19782	1.19505	1.21751	1	1	1	1	1	1
Sporosarcina	0.117354	0.217634	0.135267	2.90832	0.467192	1	0.628481	0.197788	-0.430693	1.6972	0.538797	-1.07286	0.370306	0.367092	0.401444	1	1	1	1	1	1
Ramlibacter	0.113905	0.172759	0.182273	0.650533	0.555331	1	0.367743	1.39164	1.02389	0.206048	0.780916	0.568012	1.78474	1.78205	1.80259	1	1	1	1	1	1
Iamia	0.23947	0.097054	0.132016	6.71635	0.0695974	1	-0.834768	-0.499941	0.334827	-2.52355	-1.52647	0.920625	0.330791	0.327515	0.363696	1	1	1	1	1	1
UG_Saccharimonadales	0.245756	0.113245	0.105799	5.67368	0.117221	1	-0.736252	-0.712263	0.0239894	-2.02026	-1.97187	0.0606077	0.364434	0.361212	0.395815	1	1	1	1	1	1
Leuconostoc	0.183249	0.0612534	0.218126	1.85333	0.791745	1	1.29591	2.27354	0.977632	0.771435	1.35558	0.57577	1.67987	1.67717	1.69795	1	1	1	1	1	1
Micromonospora	0.265587	0.0919183	0.0976219	2.11863	0.693385	1	-1.10147	-1.73473	-0.633264	-0.908692	-1.43439	-0.514107	1.21215	1.20938	1.23177	1	1	1	1	1	1
Virgisporangium	0.185327	0.136882	0.130788	1.44325	0.971922	1	-0.235559	-0.24052	-0.00496086	-0.959686	-0.993846	-0.0174897	0.245454	0.242009	0.283644	1	1	1	1	1	1
11-24	0.162607	0.122756	0.163895	2.33876	0.621118	1	-0.203655	0.101067	0.304722	-1.27657	0.647932	1.47709	0.159533	0.155983	0.206299	1	1	1	1	1	1
Thermobifida	0.130027	0.152687	0.163415	2.0708	0.710169	1	0.203955	0.330205	0.12625	0.838216	1.3766	0.448209	0.24332	0.23987	0.281677	1	1	1	1	1	1
Sinibacillus	0.107923	0.220664	0.117341	1.99426	0.737875	1	0.613894	0.201702	-0.412192	1.40412	0.464662	-0.884549	0.43721	0.434083	0.465991	1	1	1	1	1	1
Sphingopyxis	0.0295265	0.188178	0.225544	13.7448	0.00207196	1	2.70324	2.94189	0.238647	3.03475	3.31324	0.261574	0.890764	0.88792	0.91235	0.00240736	0.000922223	0.79365	0.0917872	0.0360844	1
Pseudoxanthomonas	0.162145	0.153191	0.12569	0.332831	0.306611	1	0.0688872	-0.175452	-0.244339	0.167612	-0.430203	-0.554537	0.410993	0.407834	0.440618	1	1	1	1	1	1
Luedemannella	0.183377	0.115257	0.135886	2.22972	0.655924	1	-0.383357	-0.185826	0.197531	-1.47397	-0.723983	0.664674	0.260085	0.256672	0.297184	1	1	1	1	1	1
Longispora	0.0955307	0.205462	0.132621	1.7852	0.819177	1	0.681229	0.344322	-0.336907	1.33255	0.677573	-0.626178	0.511221	0.508169	0.538037	1	1	1	1	1	1
BIrii41	0.220709	0.107522	0.100214	4.7411	0.186859	1	-0.676774	-0.702949	-0.0261753	-1.78502	-1.86984	-0.0638535	0.379141	0.37594	0.409927	1	1	1	1	1	1
UCG_Bacillaceae	0.14943	0.138857	0.135652	0.00421183	0.0042074	1	-0.00604666	0.00731801	0.0133647	-0.0376989	0.0466588	0.0645464	0.160393	0.156841	0.207055	1	1	1	1	1	1
UCG_Elsterales	0.233595	0.117859	0.071034	25.6027	5.51405e-06	0.00327534	-0.619056	-1.10613	-0.487071	-2.69857	-4.89607	-1.81135	0.229402	0.225921	0.268899	0.00696385	9.77713e-07	0.070086	0.265515	3.82556e-05	1
S085	0.157558	0.12649	0.132783	0.733624	0.61412	1	-0.136937	-0.0597143	0.0772223	-0.824303	-0.367333	0.364082	0.166124	0.162562	0.212101	1	1	1	1	1	1
Afipia	0.0543536	0.188956	0.171363	37.6836	1.31263e-08	7.84951e-06	1.29901	1.22266	-0.076353	5.1242	4.88911	-0.262306	0.253506	0.250078	0.291084	2.98803e-07	1.0129e-06	0.793086	1.16915e-05	3.86197e-05	1
UTCFX1	0.191186	0.112996	0.107214	2.59482	0.546476	1	-0.548848	-0.479902	0.0689458	-1.43181	-1.26247	0.166557	0.383324	0.380129	0.413948	1	1	1	1	1	1
TK10	0.143386	0.117788	0.14925	0.803949	0.662005	1	-0.112546	0.141637	0.254183	-0.45618	0.582218	0.892477	0.246714	0.243272	0.284807	1	1	1	1	1	1
Candidatus_Solibacter	0.147161	0.140784	0.115662	0.704669	0.59391	1	0.0245157	-0.13382	-0.158336	0.140928	-0.785363	-0.722932	0.173959	0.170392	0.219019	1	1	1	1	1	1
UCG_Thermoactinomycetaceae	0.0963412	0.207334	0.0975507	0.823965	0.675329	1	0.506557	0.0929688	-0.413589	0.869232	0.160355	-0.680117	0.582765	0.57977	0.608114	1	1	1	1	1	1
Subgroup_7	0.132129	0.125567	0.142781	0.609246	0.525197	1	-0.0240678	0.182718	0.206786	-0.0906089	0.696808	0.683968	0.265623	0.262221	0.302333	1	1	1	1	1	1
LWQ8	0.136961	0.143906	0.113029	0.264066	0.247376	1	-0.15834	-0.469517	-0.311178	-0.170653	-0.50758	-0.327854	0.927843	0.925011	0.949137	1	1	1	1	1	1
Pseudaminobacter	0.0963903	0.150312	0.143996	0.138929	0.134213	1	-0.615196	-0.510518	0.104678	-0.347008	-0.288401	0.0584556	1.77286	1.77017	1.79073	1	1	1	1	1	1
OLB13	0.111522	0.152016	0.126859	0.860178	0.699098	1	0.317508	0.203792	-0.113716	0.895504	0.580075	-0.294326	0.354558	0.35132	0.386361	1	1	1	1	1	1
B1-7BS	0.042692	0.209453	0.128997	12.8116	0.00330393	1	1.60631	1.13287	-0.473442	3.42344	2.43044	-0.952457	0.469211	0.466119	0.497074	0.000618347	0.0150807	0.340865	0.0241945	0.57499	1
OLB14	0.134447	0.124819	0.114977	0.0440132	0.0435324	1	0.0425878	-0.0257509	-0.0683388	0.144461	-0.0883509	-0.207309	0.294804	0.291462	0.329647	1	1	1	1	1	1
Nordella	0.0968224	0.14836	0.127972	13.218	0.00269638	1	0.497768	0.37204	-0.125729	3.08907	2.36089	-0.605304	0.161139	0.157585	0.207711	0.00200784	0.0182312	0.544977	0.0785621	0.695114	1
Cellulomonas	0.180331	0.0632357	0.111258	6.14453	0.0926321	1	-1.00839	-0.539293	0.469095	-2.45801	-1.32477	1.06638	0.410245	0.407086	0.439896	1	1	1	1	1	1
PLTA13	0.14509	0.0945778	0.106636	1.40995	0.98824	1	-0.340533	-0.213844	0.126689	-1.14188	-0.725174	0.380602	0.298222	0.294887	0.332865	1	1	1	1	1	1
Halocella	0.107779	0.125409	0.112583	0.750773	0.625953	1	0.23304	0.119419	-0.11362	0.852846	0.442517	-0.367178	0.273249	0.269864	0.309442	1	1	1	1	1	1
Ilumatobacter	0.125092	0.108345	0.110844	0.11186	0.108789	1	-0.0800708	-0.0586977	0.0213731	-0.307342	-0.228295	0.0718195	0.260526	0.257114	0.297594	1	1	1	1	1	1
Pedosphaeraceae	0.120362	0.13066	0.0916023	1.30817	0.960167	1	0.17997	-0.241255	-0.421226	0.532766	-0.721158	-1.13731	0.337804	0.334539	0.37037	1	1	1	1	1	1
Kroppenstedtia	0.244496	0.0624327	0.0355373	5.01668	0.162806	1	-0.994218	-1.47642	-0.482198	-1.46193	-2.18038	-0.685051	0.68007	0.677136	0.703886	1	1	1	1	1	1
UG_Alcaligenaceae	0.0905354	0.105086	0.136527	0.184554	0.176295	1	-0.676623	-0.550821	0.125802	-0.402279	-0.328011	0.0739988	1.68197	1.67927	1.70005	1	1	1	1	1	1
UG_Planococcaceae	0.022695	0.22455	0.0824891	2.77771	0.49872	1	2.17015	2.49605	0.325896	1.32639	1.5281	0.196996	1.63614	1.63343	1.65433	1	1	1	1	1	1
Sanguibacter-Flavimobilis	0.0064843	0	0.317348	5.9006	0.104648	1	-0.675513	2.9651	3.64062	-0.42746	1.87952	2.27733	1.5803	1.57759	1.59863	1	1	1	1	1	1
Terrimonas	0.102644	0.119958	0.0982819	1.12616	0.861093	1	0.230677	0.044276	-0.186401	1.05644	0.206081	-0.720185	0.218352	0.214848	0.258823	1	1	1	1	1	1
Pirellula	0.124292	0.0984138	0.0921352	1.1599	0.880148	1	-0.154186	-0.250609	-0.0964231	-0.625989	-1.03189	-0.339003	0.246308	0.242865	0.284432	1	1	1	1	1	1
UG_Vicinamibacterales	0.118653	0.0678591	0.126953	2.32767	0.624572	1	-1.3232	0.165243	1.48844	-1.25673	0.157361	1.38674	1.05289	1.05009	1.07334	1	1	1	1	1	1
UCG_Rhodospirillales	0.0172934	0.145984	0.147632	49.9231	2.88642e-11	1.73763e-08	2.21331	2.09796	-0.115355	6.05182	5.78737	-0.290528	0.365727	0.362506	0.397053	1.43218e-09	7.14964e-09	0.771413	5.60377e-08	2.72599e-07	1
Opitutus	0.111703	0.10017	0.0989725	0.0159254	0.0158622	1	-0.0362013	0.00155364	0.037755	-0.11468	0.00497374	0.108073	0.315673	0.31237	0.349348	1	1	1	1	1	1
Caldicoprobacter	0.13311	0.0843899	0.0928381	4.73317	0.187601	1	-0.402889	-0.261862	0.141027	-2.00563	-1.32695	0.580301	0.200879	0.197341	0.243024	1	1	1	1	1	1
UCG_Steroidobacteraceae	0.106135	0.109551	0.0934884	0.431356	0.38801	1	0.260805	0.106	-0.154806	0.656757	0.26908	-0.362354	0.397111	0.393934	0.427222	1	1	1	1	1	1
Rhodopirellula	0.0986066	0.113698	0.0965317	1.42244	0.982089	1	0.236698	0.0986578	-0.138041	1.17506	0.498527	-0.566845	0.201436	0.197899	0.243525	1	1	1	1	1	1
Marinimicrobium	0.0756087	0.123024	0.109204	7.28084	0.0524826	1	0.550259	0.402169	-0.148091	2.44485	1.81501	-0.558958	0.225069	0.221579	0.264941	1	1	1	1	1	1
Ammoniibacillus	0.0832215	0.131402	0.0919951	7.99761	0.0366752	1	0.528501	0.215801	-0.3127	2.77893	1.15632	-1.33955	0.190181	0.186626	0.233436	1	1	1	1	1	1
Pusillimonas	0.0998752	0.117354	0.0825001	0.20306	0.193092	1	0.122197	-0.113212	-0.235409	0.246719	-0.23	-0.450557	0.49529	0.492224	0.522484	1	1	1	1	1	1
Lysinibacillus	0.110166	0.0868188	0.0996692	0.087416	0.0855332	1	-0.0696499	0.0624743	0.132124	-0.166776	0.15073	0.29556	0.417627	0.414477	0.44703	1	1	1	1	1	1
Anaeromyxobacter	0.145476	0.0728716	0.077847	18.2606	0.000216667	0.126967	-0.614653	-0.592606	0.0220471	-3.35898	-3.3028	0.0971128	0.182988	0.179426	0.227026	0.000782318	0.000957263	0.922637	0.0306103	0.0364982	1
Pseudonocardia	0.0869522	0.119283	0.0875237	1.17214	0.886982	1	0.382491	0.106528	-0.275962	1.0734	0.301693	-0.711129	0.356337	0.353102	0.388062	1	1	1	1	1	1
Massilia	0.0960229	0.104591	0.0915444	0.867527	0.703869	1	0.20335	0.0875728	-0.115778	0.920548	0.402813	-0.44335	0.220901	0.217403	0.261142	1	1	1	1	1	1
UG_Paenibacillaceae	0.0331739	0.171879	0.0853879	1.13251	0.864705	1	1.09919	1.22392	0.124725	0.862655	0.962619	0.0964202	1.2742	1.27144	1.29355	1	1	1	1	1	1
Arenimonas	0.0822671	0.0988612	0.10722	6.63603	0.0724494	1	0.266334	0.361882	0.0955478	1.61542	2.2434	0.452841	0.16487	0.161309	0.210997	1	1	1	1	1	1
UG_Chitinophagaceae	0.0750416	0.116881	0.089402	3.09437	0.425692	1	0.731562	0.477703	-0.253859	1.70402	1.1209	-0.553865	0.429315	0.426179	0.458341	1	1	1	1	1	1
Sphingorhabdus	0.0574937	0.103425	0.112979	0.462975	0.413295	1	0.509801	-0.313471	-0.823272	0.424203	-0.261439	-0.674007	1.20179	1.19902	1.22146	1	1	1	1	1	1
UG_Propionibacteriaceae	0.0496539	0.107771	0.113374	3.48789	0.349659	1	1.5698	1.59197	0.0221679	1.59129	1.61838	0.0220058	0.986491	0.983676	1.00737	1	1	1	1	1	1
Aetherobacter	0.092796	0.0911494	0.0847792	0.0526675	0.0519801	1	0.0066616	-0.106574	-0.113235	0.0123976	-0.199465	-0.200926	0.537328	0.534298	0.563567	1	1	1	1	1	1
Galbibacter	0.0296065	0.0980094	0.135664	20.37	7.54647e-05	0.0445242	1.16327	1.62278	0.459513	3.04799	4.28793	1.1144	0.381652	0.378454	0.412341	0.00230375	1.80348e-05	0.265107	0.0878367	0.00070566	1
Kineosporia	0.0847708	0.102573	0.0742283	0.621751	0.53439	1	1.00857	-0.0749984	-1.08357	0.663347	-0.0494153	-0.704104	1.52043	1.51772	1.53894	1	1	1	1	1	1
Paeniclostridium	0.103784	0.095611	0.0617732	3.96868	0.274942	1	0.00811549	-0.400947	-0.409062	0.0378621	-1.90174	-1.60301	0.214343	0.210831	0.255184	1	1	1	1	1	1
SBR1031	0.112942	0.0602202	0.0874236	1.7655	0.827286	1	-0.537184	-0.137236	0.399948	-1.30768	-0.336666	0.908098	0.410791	0.407633	0.440423	1	1	1	1	1	1
Rhodococcus	0.0354658	0.125889	0.0990903	7.14653	0.0561281	1	1.48948	1.30649	-0.182995	2.41235	2.1262	-0.284954	0.617441	0.61447	0.642193	1	1	1	1	1	1
Pontibacter	0.0404044	0.123916	0.0941831	0.581423	0.504537	1	0.764487	0.306454	-0.458033	0.759693	0.305385	-0.445968	1.00631	1.0035	1.02705	1	1	1	1	1	1
UCG_Xanthomonadaceae	0.100098	0.0813808	0.0749199	0.0878363	0.0859354	1	-0.0361813	-0.10426	-0.0680789	-0.101714	-0.29579	-0.175702	0.355716	0.35248	0.387469	1	1	1	1	1	1
UCG_Pirellulaceae	0.104333	0.0616119	0.0897948	2.37879	0.608809	1	-0.511416	-0.0562648	0.455151	-1.47218	-0.163495	1.19932	0.347387	0.344138	0.379509	1	1	1	1	1	1
UCG_Sandaracinaceae	0.0603336	0.0980157	0.0961282	3.40865	0.36379	1	0.640753	0.720496	0.0797431	1.45643	1.6494	0.170157	0.439947	0.436823	0.468645	1	1	1	1	1	1
UCG_Ferrovibrionales	0.072503	0.119232	0.0602682	4.45595	0.215492	1	0.546089	-0.171511	-0.7176	1.67785	-0.532337	-2.00089	0.325471	0.322185	0.35864	1	1	1	1	1	1
UCG-012	0.113377	0.0380205	0.0915327	4.38153	0.223662	1	-1.69038	-0.125381	1.565	-1.90649	-0.141866	1.72306	0.886643	0.883798	0.908263	1	1	1	1	1	1
0319-6G20	0.0988784	0.0833367	0.0602223	0.951347	0.757067	1	-0.0927721	-0.379675	-0.286903	-0.232167	-0.957762	-0.667815	0.399592	0.396419	0.429614	1	1	1	1	1	1
Subgroup_25	0.0596865	0.0846265	0.0910527	3.9835	0.272913	1	0.575626	0.665227	0.0896015	1.53638	1.79086	0.220896	0.374665	0.371457	0.405628	1	1	1	1	1	1
UG_Oxalobacteraceae	0.125444	0.0511489	0.0585356	4.84233	0.177636	1	-0.963553	-0.778118	0.185436	-2.02993	-1.65	0.369107	0.474673	0.471586	0.50239	1	1	1	1	1	1
RBG-13-54-9	0.0855358	0.0712128	0.0778764	0.289759	0.269747	1	-0.121016	0.0076777	0.128694	-0.498912	0.0321097	0.458023	0.24256	0.239108	0.280976	1	1	1	1	1	1
UG_Peptostreptococcaceae	0.103325	0.0599252	0.0692951	0.63964	0.54744	1	-0.333796	-0.134385	0.199411	-0.799633	-0.324377	0.446264	0.417436	0.414286	0.446845	1	1	1	1	1	1
SM1A02	0.146919	0.0461432	0.0390137	5.38035	0.135738	1	-1.24998	-1.72832	-0.478349	-1.60722	-2.23056	-0.597663	0.777726	0.774839	0.800367	1	1	1	1	1	1
Limibaculum	0.0925809	0.0690475	0.0693304	0.446553	0.400213	1	-0.18261	-0.189199	-0.00658884	-0.54455	-0.569751	-0.0179032	0.335342	0.332073	0.368026	1	1	1	1	1	1
Pajaroellobacter	0.0896109	0.0649015	0.075383	1.15678	0.8784	1	-0.239476	-0.0730372	0.166439	-1.07537	-0.333203	0.633392	0.222692	0.219197	0.262773	1	1	1	1	1	1
UG_Kineosporiaceae	0.129599	0.0438541	0.0538367	1.80614	0.810648	1	-1.74847	-1.39523	0.353244	-1.26468	-1.01117	0.252048	1.38254	1.37981	1.40149	1	1	1	1	1	1
UCG_Ilumatobacteraceae	0.0523126	0.0779995	0.0961638	4.08918	0.258867	1	0.546069	0.788072	0.242003	1.33378	1.93984	0.551141	0.409416	0.406256	0.439095	1	1	1	1	1	1
NB1-j	0.0689657	0.0753286	0.0791877	0.586954	0.508667	1	0.119045	0.184999	0.0659536	0.463552	0.730093	0.22422	0.256811	0.25339	0.294146	1	1	1	1	1	1
UG_Bacillales	0.102057	0.0710282	0.0459804	2.16332	0.678064	1	-0.221568	-0.849588	-0.62802	-0.372868	-1.43696	-1.01396	0.594228	0.591241	0.619373	1	1	1	1	1	1
Nonomuraea	0.0885924	0.0459732	0.0829632	2.57947	0.550686	1	-1.31072	0.037802	1.34852	-1.39315	0.0403005	1.40175	0.94083	0.938002	0.962027	1	1	1	1	1	1
Bacteroides	0.195466	0.0161954	0.00527413	22.0553	3.24922e-05	0.0192354	-2.75319	-3.36387	-0.610673	-3.56411	-4.371	-0.767974	0.772477	0.769588	0.795174	0.000365091	1.23681e-05	0.442502	0.0139201	0.000483933	1
UCG_Ardenticatenaceae	0.105962	0.0485524	0.0620892	5.40958	0.133769	1	-0.762304	-0.462445	0.29986	-2.26211	-1.38572	0.811324	0.336988	0.333722	0.369593	1	1	1	1	1	1
Marinococcaceae	0.0551224	0.113802	0.0476022	2.41549	0.597742	1	0.664613	-0.15766	-0.822273	1.2335	-0.294266	-1.45532	0.538803	0.535775	0.565012	1	1	1	1	1	1
Gemmata	0.064822	0.0840888	0.06549	0.967504	0.767068	1	0.34056	-0.399441	-0.740001	0.466401	-0.549226	-0.982262	0.730188	0.72728	0.753364	1	1	1	1	1	1
Georgenia	0.0567775	0.0481513	0.106753	1.93293	0.760851	1	-0.779064	0.675315	1.45438	-0.759114	0.659824	1.38923	1.02628	1.02348	1.0469	1	1	1	1	1	1
Novosphingobium	0	0.0591778	0.150621	15.5626	0.000834922	0.48342	2.43047	4.14982	1.71936	2.28811	3.91708	1.58816	1.06221	1.05942	1.08261	0.0221309	8.96294e-05	0.112251	0.8438	0.00350699	1
Ellin6067	0.0558837	0.0845996	0.0678078	5.24214	0.14545	1	0.472127	0.262778	-0.209349	2.19489	1.24191	-0.818176	0.215103	0.211592	0.255872	1	1	1	1	1	1
Vulgatibacter	0.093853	0.0516966	0.0609951	2.80857	0.491085	1	-0.578623	-0.348598	0.230025	-1.63452	-0.993828	0.596185	0.354001	0.350763	0.385828	1	1	1	1	1	1
Bdellovibrio	0.131291	0.0440683	0.025674	5.34193	0.138371	1	-0.960627	-1.90116	-0.940534	-1.163	-2.30969	-1.10893	0.82599	0.823123	0.848147	1	1	1	1	1	1
UG_Thermomonosporaceae	0.0284586	0.09183	0.0787296	3.15677	0.412615	1	2.50489	1.43119	-1.0737	1.76803	1.01213	-0.747913	1.41677	1.41404	1.4356	1	1	1	1	1	1
R7C24	0.0475516	0.0694916	0.0816102	1.47566	0.956303	1	0.369905	0.508606	0.138701	0.834518	1.15556	0.293947	0.443256	0.440137	0.471855	1	1	1	1	1	1
Amaricoccus	0.083369	0.039429	0.0745516	2.9626	0.454685	1	-1.40259	0.0282779	1.43087	-1.49957	0.030325	1.49584	0.935325	0.932495	0.956562	1	1	1	1	1	1
Gracilibacillus	0.0443889	0.0932246	0.0534671	9.03605	0.0218212	1	0.796092	0.249443	-0.546649	3.00486	0.953778	-1.81194	0.264935	0.261532	0.301692	1	1	1	1	1	1
Nannocystaceae	0.0302688	0.0846424	0.0744343	2.76642	0.501545	1	2.4069	1.44525	-0.961643	1.64893	0.991975	-0.65048	1.45967	1.45695	1.47836	1	1	1	1	1	1
Roseomonas	0.0655042	0.0771085	0.0441887	4.3821	0.223598	1	0.274099	-0.316256	-0.590356	1.12172	-1.31276	-2.08878	0.244356	0.240909	0.282632	1	1	1	1	1	1
Paenisporosarcina	0.106757	0.0606805	0.0183098	9.50035	0.0173004	1	-0.467749	-2.57694	-2.10919	-0.529232	-2.92509	-2.32939	0.883826	0.88098	0.90547	1	1	1	1	1	1
Neo-b11	0.0545472	0.0654086	0.0653557	1.44835	0.969449	1	1.00372	1.03782	0.0341013	1.01507	1.05255	0.0337743	0.98882	0.986006	1.00968	1	1	1	1	1	1
OM27_clade	0.066859	0.0638517	0.0543863	0.389649	0.354042	1	0.429466	0.249708	-0.179758	0.618504	0.361144	-0.250364	0.694361	0.691435	0.717986	1	1	1	1	1	1
Phenylobacterium	0.0536839	0.0557002	0.0748271	1.18288	0.892938	1	0.758427	1.14488	0.386454	0.703782	1.06515	0.351977	1.07764	1.07485	1.09795	1	1	1	1	1	1
UCG_Thermoleophilia	0.0377497	0.068454	0.0749675	9.41911	0.0180175	1	0.72592	0.844591	0.118671	2.32562	2.7348	0.342974	0.31214	0.308831	0.346004	1	1	1	1	1	1
UG_Acidimicrobiia	0.0339126	0.067523	0.0763837	9.98035	0.013609	1	0.894589	1.04825	0.153666	2.40946	2.84798	0.381891	0.371282	0.36807	0.402381	1	1	1	1	1	1
Candidatus_Alysiosphaera	0.0770595	0.0454599	0.0485736	1.47233	0.957896	1	-0.514465	-0.40531	0.109155	-1.12657	-0.893622	0.225121	0.456664	0.453558	0.484873	1	1	1	1	1	1
A21b	0.0444078	0.0747106	0.0511724	12.1385	0.00462578	1	0.584557	0.246253	-0.338303	3.38256	1.45498	-1.5518	0.172815	0.169248	0.218007	1	1	1	1	1	1
Latescibacterota	0.0452448	0.0655264	0.058237	1.58832	0.903919	1	0.450133	0.189734	-0.260399	1.25988	0.535897	-0.669462	0.357283	0.35405	0.388968	1	1	1	1	1	1
Sorangium	0.0831992	0.0401024	0.0441897	0.947797	0.754859	1	-0.513998	-0.623304	-0.109306	-0.741227	-0.902665	-0.152432	0.693442	0.690516	0.717079	1	1	1	1	1	1
Reyranella	0.0625458	0.0465441	0.05719	0.705317	0.594366	1	-0.292363	0.0104906	0.302853	-0.752893	0.0272391	0.723225	0.388319	0.385131	0.418754	1	1	1	1	1	1
Anaerolinea	0.0582623	0.0529539	0.0516175	0.010781	0.010752	1	-0.00653519	-0.0263886	-0.0198534	-0.025252	-0.103329	-0.0670743	0.258799	0.255383	0.295991	1	1	1	1	1	1
UG_Devosiaceae	0.0487937	0.029799	0.0830221	4.13161	0.253432	1	-1.28461	0.860956	2.14557	-1.23296	0.828561	2.01952	1.0419	1.0391	1.06242	1	1	1	1	1	1
Lautropia	0.0631296	0.0525885	0.0457811	0.630359	0.540684	1	-0.0719206	-0.257939	-0.186018	-0.217539	-0.787999	-0.511708	0.33061	0.327334	0.363524	1	1	1	1	1	1
Weissella	0.0269965	0.0757332	0.0576983	2.00259	0.734807	1	1.39868	1.7306	0.331925	1.07092	1.32786	0.250456	1.30605	1.30331	1.32528	1	1	1	1	1	1
Polyangium	0.0350032	0.0666859	0.0582839	2.90567	0.467813	1	1.46773	1.24659	-0.221136	1.56717	1.33508	-0.230885	0.936546	0.933717	0.957775	1	1	1	1	1	1
UG_Geodermatophilaceae	0.0772941	0.0211672	0.0610011	1.95488	0.752545	1	-1.74699	-0.839724	0.907263	-1.39817	-0.673544	0.714975	1.24948	1.24673	1.26894	1	1	1	1	1	1
UCG_Sporichthyaceae	0.0770902	0.0373399	0.0441481	1.72079	0.845991	1	-1.22826	-0.425954	0.802302	-1.29811	-0.451529	0.829388	0.946185	0.943358	0.967342	1	1	1	1	1	1
Glycomyces	0.0355489	0.0563642	0.0659821	3.94334	0.278449	1	0.546837	0.8343	0.287463	1.25457	1.92792	0.618604	0.435875	0.432746	0.464696	1	1	1	1	1	1
Cerasibacillus	0.0284743	0.0909141	0.037539	4.20011	0.2449	1	1.70651	0.879953	-0.826559	2.04663	1.05897	-0.965718	0.833817	0.830953	0.855901	1	1	1	1	1	1
Dokdonella	0.0560275	0.0558855	0.0445516	0.598115	0.516967	1	0.10778	-0.118819	-0.226599	0.421105	-0.470522	-0.772464	0.255947	0.252525	0.293346	1	1	1	1	1	1
UG_Polyangiaceae	0.0935694	0.0326324	0.0299934	4.36503	0.225515	1	-1.42327	-2.35616	-0.932889	-1.24706	-2.06949	-0.803338	1.1413	1.13852	1.16127	1	1	1	1	1	1
Dactylosporangium	0.0877855	0.0254635	0.0403723	5.04291	0.160686	1	-1.73285	-0.66498	1.06787	-2.23576	-0.861181	1.33863	0.77506	0.772173	0.79773	1	1	1	1	1	1
Paenarthrobacter	0.0420788	0.0749811	0.0358241	1.26763	0.938872	1	1.26953	0.0397479	-1.22978	1.00034	0.0313878	-0.954443	1.2691	1.26635	1.28848	1	1	1	1	1	1
Peredibacter	0.0384957	0.0619809	0.0521501	2.84808	0.481479	1	0.562885	0.362195	-0.20069	1.62714	1.05694	-0.530754	0.345935	0.342684	0.378123	1	1	1	1	1	1
alphaI_cluster	0.0740331	0.0261362	0.0514415	5.48211	0.129005	1	-2.18638	-0.263581	1.9228	-2.16923	-0.262244	1.86926	1.00791	1.0051	1.02864	1	1	1	1	1	1
UCG_Gemmataceae	0.0715369	0.0565733	0.0231923	3.64617	0.323054	1	-0.202623	-1.04634	-0.843719	-0.353249	-1.83377	-1.40827	0.573597	0.570596	0.599116	1	1	1	1	1	1
UCG_Acidobacteriales	0.0532174	0.040256	0.0574991	0.460294	0.411167	1	-0.766847	-0.231924	0.534923	-0.664852	-0.201562	0.455907	1.15341	1.15064	1.17332	1	1	1	1	1	1
Nocardiopsis	0.035386	0.0580744	0.0553291	0.495308	0.43874	1	0.578117	-0.100821	-0.678938	0.564746	-0.09876	-0.650132	1.02368	1.02087	1.04431	1	1	1	1	1	1
OLB17	0.0331776	0.0546923	0.0581907	1.05053	0.817201	1	0.311763	1.27827	0.966506	0.240529	0.988293	0.734746	1.29616	1.29341	1.31543	1	1	1	1	1	1
Candidimonas	0.0130892	0.0142262	0.11862	2.05959	0.714162	1	0.0920149	2.1042	2.01219	0.0558324	1.27888	1.20764	1.64805	1.64535	1.66622	1	1	1	1	1	1
MWH-CFBk5	0.0677959	0.0373155	0.0358117	1.37373	0.993697	1	-0.725032	-1.20796	-0.48293	-0.695147	-1.16129	-0.454094	1.04299	1.04019	1.0635	1	1	1	1	1	1
Stenotrophobacter	0.0348516	0.0502069	0.0541341	1.95002	0.754376	1	0.981091	1.17909	0.197997	1.07431	1.29515	0.211845	0.913226	0.910389	0.934633	1	1	1	1	1	1
Ferruginibacter	0.0465744	0.0413444	0.0499312	0.643261	0.550068	1	0.027024	0.30911	0.282086	0.0652708	0.752323	0.635972	0.414029	0.410874	0.443552	1	1	1	1	1	1
Ruminiclostridium	0.0421051	0.0286501	0.0666964	3.87604	0.287978	1	-0.285007	0.694292	0.979299	-0.584513	1.43294	1.90162	0.487597	0.484524	0.514982	1	1	1	1	1	1
UG_Microtrichales	0.021074	0.0754578	0.0408004	3.50248	0.347117	1	2.41011	1.21674	-1.19337	1.87089	0.94654	-0.912699	1.28821	1.28546	1.30752	1	1	1	1	1	1
UG_Rhodobacteraceae	0.033905	0.0747514	0.027518	2.46977	0.581736	1	0.860149	-0.26064	-1.12079	1.186	-0.360825	-1.4974	0.725254	0.722344	0.74849	1	1	1	1	1	1
Jatrophihabitans	0.0196338	0.0606359	0.0557263	0.956086	0.760009	1	1.39042	1.42406	0.0336421	0.832519	0.854042	0.0199273	1.67014	1.66744	1.68824	1	1	1	1	1	1
DS-100	0.0639322	0.0416044	0.0285536	4.53305	0.207343	1	-0.394195	-0.832615	-0.438419	-0.998153	-2.1254	-1.0313	0.394924	0.391745	0.425115	1	1	1	1	1	1
Planifilum	0.0170213	0.0665008	0.0500133	8.29953	0.0315363	1	2.33838	1.9976	-0.340782	2.64142	2.26375	-0.375763	0.885274	0.882428	0.906905	1	1	1	1	1	1
Bosea	0.0573753	0.0414306	0.0341331	0.00609469	0.00608541	1	-0.0500132	-0.123874	-0.0738605	-0.0313197	-0.077705	-0.0457296	1.59686	1.59415	1.61515	1	1	1	1	1	1
AKIW781	0.0608228	0.0218516	0.0468347	4.63081	0.197452	1	-1.56328	-0.168979	1.39431	-1.99246	-0.216164	1.72741	0.784599	0.781715	0.807168	1	1	1	1	1	1
Caulobacter	0.0445928	0.0340465	0.049352	0.885935	0.715744	1	0.458219	0.905491	0.447272	0.474676	0.940761	0.453462	0.965331	0.96251	0.986351	1	1	1	1	1	1
Oligoflexus	0.0951749	0.0195054	0.012837	6.72072	0.0694457	1	-1.972	-2.10096	-0.128961	-2.14894	-2.29657	-0.137334	0.917663	0.914828	0.939035	1	1	1	1	1	1
UG_Acidobacteriales	0.0500553	0.0453018	0.0314222	1.19193	0.897941	1	-0.0542317	-0.595472	-0.541241	-0.0916112	-1.01101	-0.876983	0.591977	0.588989	0.617162	1	1	1	1	1	1
Clostridium_sensu_stricto_12	0.0357692	0.046516	0.0444874	0.287957	0.268188	1	0.309457	0.739549	0.430092	0.223432	0.53502	0.306343	1.38502	1.38228	1.40396	1	1	1	1	1	1
TM7a	0.0429497	0.0433411	0.0387332	0.299334	0.278011	1	0.181808	0.105276	-0.076532	0.535698	0.313207	-0.2058	0.339385	0.336123	0.371876	1	1	1	1	1	1
Sandaracinus	0.0386585	0.0425508	0.0435569	0.923214	0.73946	1	0.163677	0.209348	0.0456713	0.669214	0.868183	0.161475	0.24458	0.241133	0.282838	1	1	1	1	1	1
Anaerosalibacter	0.0442412	0.0481549	0.0322592	0.932172	0.745093	1	0.16531	-0.175072	-0.340382	0.517852	-0.554157	-0.965045	0.319222	0.315925	0.352711	1	1	1	1	1	1
Lachnospiraceae_UCG-007	0.0347948	0.0883364	0	3.61847	0.327558	1	0.724967	-1.89986	-2.62482	0.514576	-1.35112	-1.83847	1.40886	1.40613	1.42772	1	1	1	1	1	1
Polaromonas	0.0672917	0.0359882	0.0197146	2.27022	0.642772	1	-1.18405	-1.60171	-0.417662	-1.06621	-1.44594	-0.369402	1.11051	1.10773	1.13064	1	1	1	1	1	1
MBA03	0.0631783	0.0321602	0.0259731	2.19869	0.66618	1	-0.634839	-1.25395	-0.619112	-0.747661	-1.48179	-0.710771	0.8491	0.846241	0.871044	1	1	1	1	1	1
Pseudorhodoplanes	0.0583796	0.0371273	0.0255749	1.10694	0.850097	1	-0.984627	-1.15997	-0.175341	-0.822591	-0.971322	-0.144115	1.19698	1.19422	1.21668	1	1	1	1	1	1
UCG_Balneolaceae	0.023266	0.0496919	0.048017	4.53606	0.207031	1	1.36302	1.33932	-0.0237007	1.836	1.81116	-0.0309644	0.742383	0.739481	0.765416	1	1	1	1	1	1
UG_Lachnospiraceae	0.0249021	0.0343451	0.0601451	1.57015	0.912173	1	0.918718	1.00119	0.0824743	1.02498	1.12054	0.0898537	0.896332	0.89349	0.917873	1	1	1	1	1	1
CL500-29_marine_group	0.0484984	0.0278011	0.041824	2.0899	0.70342	1	-1.10729	-0.13013	0.977157	-1.34218	-0.158285	1.15345	0.824994	0.822126	0.84716	1	1	1	1	1	1
Hymenobacter	0.0425486	0.0375835	0.0371877	0.294274	0.273649	1	-0.375774	-0.0125723	0.363202	-0.486782	-0.0163475	0.457054	0.771956	0.769067	0.794658	1	1	1	1	1	1
UG_Pedosphaeraceae	0.0550959	0.0165019	0.0434338	6.15017	0.0923714	1	-1.64188	-0.134584	1.5073	-2.27632	-0.187345	2.02438	0.721288	0.718375	0.744572	1	1	1	1	1	1
Pelagibacterium	0.0354012	0.0431639	0.0364209	0.805534	0.663064	1	0.235307	0.0519142	-0.183393	0.890382	0.199002	-0.609117	0.264277	0.260872	0.30108	1	1	1	1	1	1
Tellurimicrobium	0.0327657	0.050219	0.0262705	1.84492	0.795079	1	1.08911	-0.661304	-1.75041	0.849373	-0.516846	-1.34484	1.28225	1.2795	1.30157	1	1	1	1	1	1
Actinoplanes	0.0164491	0.0170714	0.0731371	0.847953	0.691122	1	-0.454722	0.930949	1.38567	-0.299701	0.614677	0.902267	1.51725	1.51453	1.53577	1	1	1	1	1	1
BD2-11_terrestrial_group	0.0599023	0.0184671	0.0271604	5.10332	0.155904	1	-1.27793	-0.95556	0.322375	-2.14294	-1.61042	0.518742	0.596346	0.593361	0.621454	1	1	1	1	1	1
Flavobacterium	0.0451994	0.042776	0.0172216	2.00019	0.73569	1	-0.375983	-0.977723	-0.60174	-0.539363	-1.40849	-0.834966	0.697087	0.694163	0.720677	1	1	1	1	1	1
UCG_Sutterellaceae	0.0393364	0.028387	0.0373813	0.88352	0.714192	1	-0.202241	0.0950188	0.29726	-0.698282	0.331915	0.915267	0.289627	0.286275	0.32478	1	1	1	1	1	1
Ammoniphilus	0.0170741	0.043364	0.0431059	5.17317	0.150553	1	1.36941	1.41032	0.0409064	1.91306	1.97826	0.0553408	0.715822	0.712906	0.739173	1	1	1	1	1	1
Bauldia	0.0328032	0.0225822	0.0463254	2.19102	0.668739	1	-0.727492	0.441939	1.16943	-0.938235	0.572093	1.46536	0.775383	0.772495	0.798049	1	1	1	1	1	1
Methylobacter	0.0322499	0.027538	0.0415489	1.44034	0.97334	1	-0.0210094	0.394501	0.41551	-0.0565753	1.0716	1.03245	0.371354	0.368141	0.40245	1	1	1	1	1	1
Noviherbaspirillum	0.0447975	0.0415265	0.013832	0.616348	0.530425	1	-0.340593	-0.967811	-0.627218	-0.272594	-0.776302	-0.494296	1.24945	1.24669	1.26891	1	1	1	1	1	1
Aminobacter	0.0148015	0.0104545	0.0738777	6.77312	0.0676498	1	-0.563356	1.92542	2.48878	-0.571468	1.95874	2.47225	0.985805	0.98299	1.00668	1	1	1	1	1	1
Kaistia	0.0244669	0.0342506	0.0402672	1.76114	0.829094	1	0.801425	1.11778	0.316355	0.914665	1.27988	0.352327	0.876196	0.873347	0.897903	1	1	1	1	1	1
Hamadaea	0.0398169	0.0321365	0.0250778	0.346006	0.31773	1	-0.882639	-0.782616	0.100022	-0.534732	-0.474913	0.0599376	1.65062	1.64792	1.66877	1	1	1	1	1	1
UG_Hungateiclostridiaceae	0.0404498	0.0433094	0.0131414	1.64744	0.877591	1	-0.260787	-0.968634	-0.707847	-0.335769	-1.25179	-0.88554	0.776687	0.7738	0.799338	1	1	1	1	1	1
Frankiales	0.0326436	0.04794	0.0146287	0.560011	0.488441	1	1.00755	-0.0795575	-1.08711	0.627662	-0.0496446	-0.669601	1.60525	1.60254	1.62352	1	1	1	1	1	1
Nitrolancea	0.0221754	0.0377439	0.0344491	0.237672	0.224093	1	0.414851	-0.0258222	-0.440673	0.415362	-0.0259269	-0.432218	0.998771	0.99596	1.01956	1	1	1	1	1	1
Cellulosilyticum	0.0347575	0.0448424	0.0138906	1.38185	0.997776	1	0.843872	-0.204295	-1.04817	0.910791	-0.221172	-1.10586	0.926526	0.923694	0.94783	1	1	1	1	1	1
Aeromicrobium	0.0227855	0.0206017	0.049387	1.42856	0.979088	1	-0.473468	1.00349	1.47695	-0.380507	0.808251	1.16867	1.24431	1.24155	1.26379	1	1	1	1	1	1
Conexibacter	0.0205277	0.0273107	0.0443643	1.81627	0.80655	1	0.383838	1.43786	1.05403	0.348638	1.30932	0.940136	1.10096	1.09818	1.12114	1	1	1	1	1	1
Lutispora	0.0287127	0.0156104	0.0475317	9.75883	0.0152029	1	-0.544499	0.586231	1.13073	-1.65399	1.79867	3.12196	0.329203	0.325924	0.362186	1	1	1	1	1	1
Nakamurella	0.0229598	0.0198708	0.0481341	2.38358	0.607355	1	-0.0960085	1.32993	1.42594	-0.0941978	1.30845	1.37125	1.01922	1.01642	1.03988	1	1	1	1	1	1
UCG_Methylococcaceae	0.0198043	0.0337201	0.0364914	3.33417	0.377594	1	1.03691	1.15056	0.11365	1.47193	1.64006	0.156122	0.704459	0.701538	0.727953	1	1	1	1	1	1
Caenimonas	0.0175773	0.0355432	0.0366195	0.438541	0.393791	1	1.04581	0.388162	-0.657648	0.656476	0.244072	-0.40813	1.59307	1.59036	1.61137	1	1	1	1	1	1
UCG_Acetobacteraceae	0.0586371	0.00569047	0.0251764	5.82681	0.108581	1	-2.39159	-1.14593	1.24565	-2.41386	-1.1599	1.23135	0.990772	0.987958	1.01162	1	1	1	1	1	1
Luteolibacter	0.0162861	0.0317354	0.0406594	3.20663	0.402458	1	1.06453	1.27868	0.214151	1.37485	1.65761	0.268707	0.77429	0.771402	0.796967	1	1	1	1	1	1
Vitellibacter	0.0107486	0.0390815	0.0386568	1.58767	0.904216	1	0.872617	1.37941	0.506796	0.78364	1.24186	0.447046	1.11354	1.11076	1.13365	1	1	1	1	1	1
Thermoflavimicrobium	0.0377838	0.027569	0.0228879	0.625969	0.537478	1	-0.764807	-0.745073	0.0197338	-0.688602	-0.67252	0.0174513	1.11067	1.10788	1.13079	1	1	1	1	1	1
UCG_Micropepsaceae	0.0274321	0.0384557	0.0214827	1.62395	0.887962	1	1.00888	0.427549	-0.581336	1.27276	0.541344	-0.713158	0.792672	0.789792	0.815157	1	1	1	1	1	1
JTB255_marine_benthic_group	0.0377646	0.0145846	0.0347529	15.7833	0.00074771	0.433672	-0.87661	-0.0350471	0.841563	-3.83177	-0.155562	3.13635	0.228774	0.225293	0.268326	0.000127226	0.876378	0.00171064	0.00497807	1	0.0652226
UTBCD1	0.0090746	0.0472749	0.0303517	3.79934	0.299237	1	1.9141	0.960015	-0.954083	1.94834	0.979996	-0.950918	0.982427	0.979611	1.00333	1	1	1	1	1	1
UG_Cyclobacteriaceae	0	0.0492556	0.0373344	828.868	2.06322e-180	1.26475e-177	3.07331	2.82123	-0.252074	21.7166	20.4312	-1.32393	0.141519	0.138084	0.190398	1.43087e-104	8.82268e-93	0.185525	5.59865e-103	3.36388e-91	1
UG_Micrococcales	0.00163615	0.0380138	0.0453952	6.5686	0.0749337	1	1.32824	2.71785	1.3896	1.24919	2.56282	1.2823	1.06329	1.06049	1.08368	1	1	1	1	1	1
Geodermatophilus	0.0602511	0	0.0244272	4.08476	0.259439	1	-2.3894	-0.549261	1.84014	-1.942	-0.447418	1.4722	1.23038	1.22762	1.24993	1	1	1	1	1	1
SWB02	0.0405024	0.0173036	0.0247083	0.382623	0.348249	1	-0.569668	0.143213	0.712881	-0.474054	0.11945	0.583674	1.20169	1.19893	1.22137	1	1	1	1	1	1
UG_Clostridia	0.0334929	0.0308985	0.0172678	0.835012	0.682625	1	-0.0940983	-0.881727	-0.787628	-0.0895325	-0.841183	-0.735098	1.051	1.0482	1.07146	1	1	1	1	1	1
Sumerlaea	0.0178846	0.0382711	0.0250712	1.36778	0.990698	1	1.17288	0.354648	-0.818231	1.14698	0.34777	-0.78433	1.02258	1.01978	1.04322	1	1	1	1	1	1
Parapedobacter	0.00567376	0.04544	0.0299412	18.8126	0.000164406	0.0965061	2.316	1.94155	-0.374456	3.97403	3.3487	-0.615745	0.582785	0.57979	0.608134	7.06679e-05	0.000811902	0.538063	0.00276507	0.0309559	1
Caldalkalibacillus	0.026929	0.0246806	0.0291577	0.0871484	0.0852769	1	-0.315209	-0.301948	0.0132611	-0.259188	-0.248849	0.0107312	1.21614	1.21338	1.23575	1	1	1	1	1	1
Blastopirellula	0.0064843	0.0467836	0.0258666	4.43302	0.217977	1	2.15491	1.19131	-0.963598	2.09763	1.16282	-0.919538	1.02731	1.0245	1.04792	1	1	1	1	1	1
Achromobacter	0.0271449	0.018247	0.033536	0.15243	0.146766	1	-0.220906	0.307994	0.5289	-0.164577	0.229928	0.38851	1.34226	1.33952	1.36136	1	1	1	1	1	1
UG_Gammaproteobacteria	0.0320118	0.0192419	0.0276175	0.215244	0.204066	1	-0.355443	-0.111133	0.24431	-0.456993	-0.143416	0.305224	0.777788	0.774901	0.800428	1	1	1	1	1	1
M55-D21	0.03	0.0240797	0.0245676	0.607721	0.524072	1	0.51403	0.623185	0.109155	0.595758	0.724664	0.123389	0.862817	0.859964	0.88464	1	1	1	1	1	1
UCG_Halobacteroidaceae	0.0403252	0.0182434	0.0186966	1.24384	0.926174	1	-0.977399	-0.964138	0.0132611	-0.963908	-0.953469	0.0128165	1.014	1.01119	1.03469	1	1	1	1	1	1
Limnochorda	0.0247736	0.0303836	0.0218749	0.740258	0.618709	1	0.302776	0.0146315	-0.288145	0.799795	0.0389792	-0.703863	0.378568	0.375366	0.409376	1	1	1	1	1	1
IS-44	0.0219599	0.0242528	0.0305616	0.742679	0.620381	1	0.135347	0.870759	0.735412	0.125304	0.808236	0.668287	1.08015	1.07736	1.10044	1	1	1	1	1	1
Blautia	0.069522	0.00711308	0	11.8904	0.00523672	1	-2.13221	-2.79058	-0.658373	-2.49502	-3.27638	-0.751157	0.854584	0.851728	0.876479	1	1	1	1	1	1
IMCC26207	0.0246942	0.00932192	0.0418417	9.74894	0.0152783	1	-1.08623	0.635021	1.72125	-2.04346	1.20149	3.08508	0.531564	0.52853	0.557926	1	1	1	1	1	1
UG_Actinobacteria	0.0263079	0.0363756	0.0125386	0.454036	0.406187	1	0.476742	-0.300189	-0.776931	0.417088	-0.263267	-0.668051	1.14302	1.14025	1.16298	1	1	1	1	1	1
Tissierella	0.0254933	0.0182714	0.0311647	1.96009	0.75059	1	-0.704627	0.27734	0.981968	-1.00526	0.397325	1.35541	0.700942	0.698019	0.724481	1	1	1	1	1	1
Phaselicystis	0.0154907	0.0133502	0.045669	0.483565	0.429546	1	-0.0337499	0.727987	0.761737	-0.0275327	0.595224	0.611653	1.22581	1.22305	1.24537	1	1	1	1	1	1
Melghirimyces	0.0232471	0.0283556	0.0224721	1.02574	0.802453	1	0.756158	0.559883	-0.196275	0.967184	0.718786	-0.243998	0.781814	0.778929	0.804412	1	1	1	1	1	1
Herbinix	0.0235056	0.015634	0.0334362	0.78449	0.648923	1	-0.141341	1.07855	1.21989	-0.0946196	0.723343	0.80661	1.49378	1.49106	1.51237	1	1	1	1	1	1
Stackebrandtia	0.0410791	0.00521132	0.0260722	3.07034	0.430838	1	-1.84851	-0.428743	1.41976	-1.68638	-0.392136	1.2718	1.09614	1.09335	1.11635	1	1	1	1	1	1
Subgroup_10	0.0164338	0.0178506	0.0362163	14.004	0.00182011	1	0.123785	0.907391	0.783606	0.49316	3.66518	2.71361	0.251003	0.247571	0.288769	0.621899	0.000247164	0.00665551	1	0.00967093	0.253759
JG30-KF-AS9	0.0214783	0.0226885	0.026324	0.186018	0.177629	1	0.134092	0.498999	0.364907	0.112326	0.418973	0.30071	1.19377	1.19101	1.21348	1	1	1	1	1	1
UCG_Acidimicrobiia	0.010537	0.0350678	0.0245203	3.31327	0.38156	1	1.86078	0.9953	-0.865476	1.81627	0.974159	-0.828101	1.02451	1.0217	1.04513	1	1	1	1	1	1
UG_Firmicutes	0.0179642	0.0252778	0.0268563	0.969372	0.768219	1	0.385142	1.00591	0.620772	0.373691	0.978667	0.590517	1.03064	1.02784	1.05123	1	1	1	1	1	1
UG_Nannocystaceae	0.0252855	0.0136851	0.0310645	0.150089	0.144595	1	-0.497333	-0.420991	0.0763418	-0.35782	-0.30349	0.0541885	1.3899	1.38716	1.40882	1	1	1	1	1	1
UG_Xanthomonadaceae	0.0108055	0.0274476	0.0315283	3.18703	0.406421	1	1.28652	1.09636	-0.190159	1.63559	1.39896	-0.235017	0.78658	0.783698	0.809128	1	1	1	1	1	1
Clostridium_sensu_stricto_6	0.00734007	0.039046	0.023198	2.12723	0.690411	1	1.16939	1.3601	0.19071	1.14804	1.33896	0.183506	1.01859	1.01579	1.03926	1	1	1	1	1	1
Variovorax	0	0.0128036	0.0552289	16.1863	0.000611249	0.356358	0.981091	3.21228	2.23118	1.2033	3.95377	2.66381	0.815331	0.81246	0.83759	0.228859	7.69305e-05	0.00772601	1	0.00301011	0.294575
UG_Gemmataceae	0.00585911	0.00298699	0.0590095	2.35882	0.614919	1	-0.168905	1.53329	1.7022	-0.13983	1.27226	1.38663	1.20793	1.20517	1.22758	1	1	1	1	1	1
Virgibacillus	0.017369	0.0501736	0	3.3562	0.373457	1	0.685612	-1.44004	-2.12565	0.587804	-1.23755	-1.79193	1.1664	1.16362	1.18624	1	1	1	1	1	1
UCG_Myxococcaceae	0.0188728	0.0239814	0.0244272	0.278905	0.260331	1	0.334159	-0.0701672	-0.404327	0.41831	-0.0881549	-0.492328	0.798832	0.795954	0.821254	1	1	1	1	1	1
Hydrogenedensaceae	0.0631066	0.00173711	0.00238823	71.7937	5.14316e-16	3.11675e-13	-2.97094	-2.72663	0.24431	-7.39875	-6.84437	0.56619	0.401546	0.398375	0.431499	1.37469e-13	7.68132e-12	0.571265	5.37884e-12	2.92871e-10	1
UG_Burkholderiales	0.00669613	0.0300142	0.0299645	3.37724	0.369549	1	1.32824	1.84068	0.512434	1.27539	1.77219	0.482534	1.04144	1.03864	1.06197	1	1	1	1	1	1
Clostridium_sensu_stricto_8	0.0271219	0.0304312	0.00905589	1.7958	0.814849	1	-0.455411	-1.41612	-0.960712	-0.422962	-1.31864	-0.875737	1.07672	1.07393	1.09703	1	1	1	1	1	1
Cohnella	0.0157141	0.0142782	0.0365676	4.06585	0.261903	1	-0.367267	1.05848	1.42574	-0.514103	1.48774	1.93255	0.714384	0.711468	0.737753	1	1	1	1	1	1
UCG_Rhizobiales	0.0190999	0.0135743	0.0333773	2.68302	0.5229	1	0.113528	1.11263	0.999098	0.153926	1.51451	1.3135	0.737549	0.734644	0.760638	1	1	1	1	1	1
Pla1_lineage	0.050839	0.00315972	0.0113443	17.3126	0.000348062	0.203616	-2.52626	-1.54954	0.976718	-4.09523	-2.52407	1.52223	0.616877	0.613906	0.641639	4.21741e-05	0.0116006	0.127953	0.00165017	0.442304	1
UG_Polyangiales	0.0174069	0.0237423	0.0228876	0.0765506	0.0751041	1	0.237701	0.332184	0.0944829	0.191013	0.267531	0.0747545	1.24442	1.24167	1.26391	1	1	1	1	1	1
Alkaliphilus	0.0219524	0.0272903	0.0146281	0.973431	0.770716	1	0.767414	-0.152911	-0.920325	0.781713	-0.156209	-0.917925	0.981708	0.978892	1.00261	1	1	1	1	1	1
Clostridium_sensu_stricto_13	0.0295765	0.013193	0.0208271	0.36494	0.333581	1	-0.483725	0.148302	0.632027	-0.449736	0.13824	0.57672	1.07558	1.07279	1.0959	1	1	1	1	1	1
UG_Chloroflexi	0.01493	0.0120144	0.0361165	5.29256	0.141829	1	-0.0431401	1.15205	1.19519	-0.0751504	2.01742	1.99344	0.574051	0.57105	0.599561	1	1	1	1	1	1
Aquicella	0.0204219	0.0218984	0.0198906	0.257813	0.241887	1	0.232419	0.284942	0.0525221	0.382639	0.471418	0.0830612	0.607412	0.604435	0.632331	1	1	1	1	1	1
Stenotrophomonas	0	0.00521132	0.0564295	15.2214	0.000990233	0.572355	0.614887	2.9489	2.33401	0.777195	3.74092	2.86852	0.791161	0.78828	0.813662	0.437044	0.000183346	0.00412391	1	0.00717389	0.157235
CPla-3_termite_group	0.0228157	0.0247167	0.0139847	0.184896	0.176607	1	0.0459133	-0.450256	-0.496169	0.0363744	-0.357491	-0.387133	1.26224	1.25949	1.28165	1	1	1	1	1	1
Proteiniborus	0.0178921	0.0130283	0.0297302	1.92835	0.762596	1	-0.652516	0.814687	1.4672	-0.628314	0.786592	1.38538	1.03852	1.03572	1.05906	1	1	1	1	1	1
Litorilinea	0.0302319	0.0186129	0.0109578	2.73465	0.509574	1	-0.131129	-1.04206	-0.910935	-0.193716	-1.54614	-1.2999	0.676912	0.673977	0.700772	1	1	1	1	1	1
Kribbella	0.0265194	0.0145451	0.0183976	0.0633911	0.0623971	1	-0.293803	-0.184648	0.109155	-0.24826	-0.156391	0.09072	1.18345	1.18068	1.20321	1	1	1	1	1	1
UG_Bacilli	0.02302	0.0195992	0.0163081	0.522701	0.459978	1	-0.0174865	-0.274535	-0.257049	-0.0425089	-0.672547	-0.582913	0.41136	0.408203	0.440973	1	1	1	1	1	1
UG_Acidobacteriae	0.0273301	0.0129807	0.0184624	0.990701	0.781285	1	-0.835371	-0.290799	0.544572	-0.985839	-0.34434	0.626428	0.847371	0.844512	0.86933	1	1	1	1	1	1
UCG_Oligoflexaceae	0.0302846	0.00397735	0.024023	22.3153	2.85321e-05	0.0169196	-1.84102	-0.194038	1.64698	-4.46215	-0.473924	3.72488	0.412585	0.409428	0.442156	8.11401e-06	0.635554	0.000195408	0.000317482	1	0.00745045
KI89A_clade	0.0231147	0.0131225	0.0217109	1.17581	0.889021	1	-0.676541	-0.0187837	0.657757	-0.973277	-0.0271366	0.915164	0.695116	0.692191	0.718732	1	1	1	1	1	1
PAUC26f	0.00810537	0.0219063	0.0274881	1.07939	0.834148	1	1.05399	1.13844	0.0844525	0.857186	0.927952	0.0676086	1.22959	1.22683	1.24914	1	1	1	1	1	1
AKYH767	0.0113626	0.0163571	0.0290979	1.86729	0.786238	1	0.875807	1.09636	0.220556	1.02124	1.28269	0.250785	0.857592	0.854736	0.87946	1	1	1	1	1	1
UG_Pseudomonadales	0.00901042	0.0172217	0.0300347	4.45598	0.21549	1	0.721038	1.22126	0.500222	1.22617	2.08745	0.81563	0.588041	0.58505	0.613295	1	1	1	1	1	1
Sporacetigenium	0.00818076	0.0316531	0.0154884	4.54263	0.206353	1	1.85111	0.724042	-1.12707	2.12248	0.832904	-1.26086	0.872148	0.869298	0.89389	1	1	1	1	1	1
Shinella	0	0.0280766	0.0271674	10.056	0.0131041	1	2.50022	1.92009	-0.580129	3.00289	2.31409	-0.678754	0.832603	0.829739	0.854698	1	1	1	1	1	1
Parviterribacter	0.032057	0.0189547	0.00417964	4.3625	0.225801	1	-0.822298	-1.82586	-1.00356	-0.937243	-2.08786	-1.11623	0.877358	0.87451	0.899056	1	1	1	1	1	1
UG_Beijerinckiaceae	0.0220202	0	0.0325925	9.18248	0.0202805	1	-1.67823	0.748181	2.42641	-2.10166	0.940339	2.9556	0.798528	0.79565	0.820954	1	1	1	1	1	1
Ornithinicoccus	0.0129686	0.0295306	0.0119412	2.68397	0.522654	1	1.61346	0.105276	-1.50819	1.48128	0.0968991	-1.35936	1.08924	1.08645	1.10948	1	1	1	1	1	1
UCG_Rhodothermaceae	0.0302201	0.0120848	0.0117305	1.51702	0.936729	1	-0.897172	-1.01907	-0.121894	-0.982851	-1.11987	-0.130474	0.912826	0.909989	0.934236	1	1	1	1	1	1
Nocardia	0.0187781	0.0179953	0.0171098	0.0168569	0.0167861	1	0.09643	-0.0560665	-0.152496	0.0825222	-0.0480942	-0.128324	1.16853	1.16576	1.18837	1	1	1	1	1	1
UG_Enterobacteriaceae	0.00243161	0.00284523	0.047667	4.23642	0.240494	1	0.113528	2.00226	1.88873	0.104843	1.85387	1.71218	1.08284	1.08004	1.10312	1	1	1	1	1	1
Halomonas	0.00654461	0.0248545	0.0213952	1.29329	0.9524	1	1.14858	1.20635	0.0577716	0.953024	1.00326	0.0471662	1.20519	1.20243	1.22485	1	1	1	1	1	1
Hirschia	0.034564	0.0117703	0.00642715	5.81225	0.109375	1	-1.21199	-1.84737	-0.635376	-1.5425	-2.3598	-0.786076	0.785731	0.782848	0.808288	1	1	1	1	1	1
Arcticibacter	0.00162107	0.0014935	0.0492586	6.31607	0.0850186	1	0.0176337	2.22674	2.20911	0.0175006	2.21611	2.14823	1.00761	1.0048	1.02834	1	1	1	1	1	1
UG_Methylophilaceae	0.0465173	0	0.00557254	4.09297	0.258376	1	-2.13094	-1.37315	0.757792	-1.98762	-1.28414	0.693664	1.07211	1.06931	1.09245	1	1	1	1	1	1
UCG_Sphingobacteriaceae	0.00567376	0.0242883	0.0214238	0.892005	0.719636	1	1.18169	0.47673	-0.704961	0.940642	0.380317	-0.55261	1.25626	1.2535	1.27569	1	1	1	1	1	1
Subgroup_18	0.023596	0.01585	0.0116427	0.379085	0.345325	1	0.132581	-0.451411	-0.583992	0.135653	-0.463207	-0.584993	0.977352	0.974534	0.998288	1	1	1	1	1	1
Roseimicrobium	0.0215241	0.0232107	0.00626946	1.72504	0.844196	1	0.504901	-0.817616	-1.32252	0.506678	-0.822815	-1.30003	0.996492	0.99368	1.0173	1	1	1	1	1	1
Methylotenera	0.0336476	0.0115936	0.00487625	5.04221	0.160741	1	-1.18299	-1.78998	-0.60699	-1.44636	-2.1962	-0.722487	0.817905	0.815035	0.840139	1	1	1	1	1	1
Desulfitibacter	0.0170891	0.0085357	0.0231218	2.33867	0.621147	1	-0.714774	0.781542	1.49632	-0.746255	0.818375	1.52859	0.957816	0.954993	0.978889	1	1	1	1	1	1
UCG_Defluviicoccales	0.031182	0.00522724	0.0122748	5.56616	0.123696	1	-1.81515	-1.10874	0.706408	-2.32833	-1.42749	0.880576	0.779591	0.776705	0.802212	1	1	1	1	1	1
UCG_Microtrichaceae	0.0205507	0.0206335	0.00686628	1.48309	0.952756	1	-0.399954	-1.01907	-0.619112	-0.474358	-1.21276	-0.715616	0.843148	0.840287	0.865146	1	1	1	1	1	1
C1-B045	0.0122259	0.0126947	0.0230865	0.516477	0.455178	1	-0.367623	0.520622	0.888245	-0.300567	0.426621	0.714784	1.2231	1.22034	1.24268	1	1	1	1	1	1
Ellin516	0.0478465	0	0	169.817	2.66562e-37	1.63136e-34	-2.86802	-2.75886	0.109155	-10.8169	-10.5404	0.361577	0.265144	0.261741	0.301887	2.86452e-27	5.62407e-26	0.717668	1.12082e-25	2.14433e-24	1
UCG_Micromonosporaceae	0.0180208	0.0137315	0.0151255	0.867504	0.703854	1	-0.139034	-0.779385	-0.640351	-0.157001	-0.882941	-0.705862	0.88556	0.882715	0.90719	1	1	1	1	1	1
Asticcacaulis	0.00896868	0.00953053	0.0276873	3.09222	0.42615	1	0.136525	1.23065	1.09413	0.18021	1.63066	1.40191	0.757591	0.754696	0.780451	1	1	1	1	1	1
UCG_Vicinamibacteraceae	0.0293377	0.00497916	0.0117538	1.31715	0.964822	1	-1.25125	-0.63549	0.615764	-1.14703	-0.584051	0.554195	1.09086	1.08807	1.1111	1	1	1	1	1	1
Citrifermentans	0.0197971	0.0141364	0.0117538	0.148248	0.142887	1	-0.319567	-0.372247	-0.0526808	-0.30289	-0.353759	-0.0489826	1.05506	1.05226	1.0755	1	1	1	1	1	1
A4b	0.0203539	0.011024	0.0141421	0.118394	0.114958	1	-0.361644	-0.214713	0.146931	-0.341114	-0.203059	0.135973	1.06018	1.05739	1.0806	1	1	1	1	1	1
UCG_Cellvibrionaceae	0.00896868	0.0239619	0.0123746	2.80475	0.492025	1	1.21214	0.313327	-0.898813	1.63069	0.423172	-1.17285	0.743329	0.740427	0.76635	1	1	1	1	1	1
GWA2-38-13b	0.00737041	0.0216389	0.016022	0.259211	0.243116	1	0.554113	0.112602	-0.441511	0.485408	0.0988813	-0.380119	1.14154	1.13876	1.16151	1	1	1	1	1	1
Marmoricola	0.034231	0.0104545	0	2.93212	0.461665	1	-1.12004	-1.89057	-0.770531	-1.00399	-1.69893	-0.67847	1.11559	1.1128	1.13569	1	1	1	1	1	1
ADurb.Bin063-1	0.00818076	0.0253531	0.0111451	2.90588	0.467764	1	1.57773	0.238946	-1.33878	1.59868	0.242813	-1.32847	0.98689	0.984076	1.00776	1	1	1	1	1	1
Sericytochromatia	0.00907478	0.0104545	0.0250652	3.26055	0.391751	1	-0.236413	1.27359	1.51001	-0.267584	1.44618	1.66823	0.883509	0.880663	0.905155	1	1	1	1	1	1
Blfdi19	0.0270162	0.0124821	0.00457752	3.06268	0.432492	1	-0.778898	-1.37315	-0.594249	-0.983301	-1.73982	-0.729483	0.792126	0.789246	0.814617	1	1	1	1	1	1
UCG_Hungateiclostridiaceae	0.0196039	0.00657897	0.0177069	1.05194	0.818037	1	-0.802229	-0.239415	0.562814	-1.00714	-0.30166	0.68721	0.796538	0.79366	0.818984	1	1	1	1	1	1
Pseudomonadales	0.0212213	0.0129224	0.00965271	0.630387	0.540705	1	-0.57437	-0.605619	-0.0312493	-0.66146	-0.699745	-0.0351072	0.868337	0.865486	0.890112	1	1	1	1	1	1
Desulfallas-Sporotomaculum	0.0174221	0.0047241	0.0216348	6.38681	0.0820638	1	-0.997207	0.447726	1.44493	-1.77857	0.802855	2.46389	0.560678	0.557667	0.586444	1	1	1	1	1	1
KF-JG30-B3	0	0.0196306	0.0240699	11.0401	0.00801113	1	1.74862	2.33614	0.587517	2.36235	3.16851	0.769746	0.740202	0.737299	0.76326	1	1	1	1	1	1
Thermoactinomyces	0.0212021	0.0130516	0.00905589	0.365456	0.334011	1	-0.211244	-0.695041	-0.483797	-0.17961	-0.592352	-0.404539	1.17613	1.17336	1.19592	1	1	1	1	1	1
Constrictibacter	0.00911248	0.0109177	0.0229225	2.0683	0.711056	1	0.225685	1.08086	0.855171	0.286929	1.37922	1.05694	0.786554	0.783671	0.809102	1	1	1	1	1	1
Edaphobaculum	0.00987373	0.0222203	0.0107765	3.07158	0.430572	1	1.09059	0.453732	-0.63686	1.75091	0.731938	-0.983513	0.622872	0.619905	0.647536	1	1	1	1	1	1
UG_Family_XI	0.00915422	0.00284523	0.0306434	9.45929	0.0176592	1	-0.483725	1.59115	2.07487	-0.704794	2.32826	2.92208	0.686336	0.683406	0.710068	1	1	1	1	1	1
DTU014	0.00983236	0.010171	0.0224721	2.42001	0.596391	1	0.152789	1.13562	0.982835	0.194993	1.45466	1.21919	0.783561	0.780677	0.806141	1	1	1	1	1	1
Subgroup_22	0.00729483	0.0165099	0.0185676	2.32007	0.626951	1	0.852052	1.35642	0.504363	0.939939	1.50103	0.54352	0.906497	0.903659	0.927957	1	1	1	1	1	1
HN-HF0106	0.0105898	0.0148636	0.0168523	0.982578	0.776326	1	0.605497	0.528113	-0.0773834	0.898081	0.786732	-0.110847	0.674211	0.671274	0.698108	1	1	1	1	1	1
BBMC-4	0.0254405	0.0116725	0.00487625	2.33973	0.620819	1	-0.862647	-1.33448	-0.471835	-0.967655	-1.50172	-0.516761	0.891482	0.888638	0.913062	1	1	1	1	1	1
oc32	0.0115594	0.0166162	0.0136624	0.846446	0.690135	1	0.554113	0.499866	-0.054247	0.822544	0.745267	-0.0777665	0.673658	0.67072	0.697562	1	1	1	1	1	1
Cytophagaceae	0.0163314	0.00800159	0.0159219	0.241684	0.227652	1	-0.234928	0.288625	0.523553	-0.224457	0.2765	0.490612	1.04665	1.04385	1.06714	1	1	1	1	1	1
Aneurinibacillus	0.00741951	0.0209236	0.0114731	1.90936	0.769869	1	0.920317	0.663268	-0.257049	1.32567	0.959451	-0.35808	0.694226	0.6913	0.717853	1	1	1	1	1	1
Coxiella	0.013044	0.0189658	0.00769163	0.0450831	0.0445788	1	0.064221	-0.13938	-0.203601	0.0667961	-0.145396	-0.207229	0.961448	0.958626	0.982496	1	1	1	1	1	1
SH-PL14	0.00409038	0.0237024	0.0117831	5.0438	0.160614	1	1.76169	0.389608	-1.37208	2.16175	0.479773	-1.63889	0.814938	0.812067	0.837201	1	1	1	1	1	1
P3OB-42	0.0154947	0.0159094	0.00799004	0.270431	0.252945	1	0.0621442	-0.386693	-0.448837	0.0675587	-0.421684	-0.476873	0.919854	0.917019	0.941209	1	1	1	1	1	1
UCG_Saprospiraceae	0.00907478	0.0142941	0.015705	0.179066	0.171284	1	0.331836	0.384519	0.0526824	0.333794	0.387885	0.051906	0.994135	0.991322	1.01496	1	1	1	1	1	1
OM60(NOR5)_clade	0.00163615	0.0244411	0.012837	6.72357	0.0693466	1	1.95667	1.3119	-0.644766	2.5261	1.70003	-0.808732	0.774581	0.771693	0.797256	1	1	1	1	1	1
UCG_Rhodobacteraceae	0.0157897	0.0225824	0	1.54597	0.923268	1	-0.34857	-1.32545	-0.976877	-0.316539	-1.2067	-0.871145	1.10119	1.09841	1.12137	1	1	1	1	1	1
Arsenicitalea	0.00736269	0	0.0307492	4.18758	0.246438	1	-0.714774	1.40621	2.12098	-0.690092	1.36133	2.00789	1.03577	1.03297	1.05632	1	1	1	1	1	1
Prevotella_9	0.0114531	0.0166672	0.00995112	0.411282	0.37175	1	0.704775	0.441609	-0.263165	0.632411	0.397259	-0.231959	1.11443	1.11164	1.13453	1	1	1	1	1	1
Alterococcus	0.0346211	0	0.00321357	62.7171	4.81039e-14	2.90066e-11	-2.58636	-2.111	0.475359	-7.19567	-5.9264	1.21568	0.359433	0.356203	0.391025	6.21563e-13	3.0965e-09	0.224108	2.43203e-11	1.18062e-07	1
UG_Pseudonocardiaceae	0.0116235	0.011948	0.0139255	0.0929406	0.0908142	1	-0.327058	-0.287116	0.039942	-0.277561	-0.244237	0.0333375	1.17833	1.17556	1.19811	1	1	1	1	1	1
UCG_Desulfotomaculales_Incertae_Sedis	0.00567376	0.0190023	0.0127375	1.07266	0.830218	1	0.964828	0.903708	-0.06112	0.917295	0.861478	-0.0570002	1.05182	1.04902	1.07228	1	1	1	1	1	1
Desulfohalotomaculum	0.0174069	0.00987599	0.00955292	0.315104	0.291536	1	-0.34857	-0.605619	-0.257049	-0.320416	-0.558133	-0.231968	1.08787	1.08508	1.10812	1	1	1	1	1	1
Aurantisolimonas	0.00911634	0.022134	0.00530339	7.67635	0.0430658	1	1.12837	-0.251538	-1.37991	2.22382	-0.498742	-2.58262	0.5074	0.504345	0.534304	1	1	1	1	1	1
Ohtaekwangia	0.00729483	0.00505004	0.0241517	4.10697	0.256574	1	0.0527539	1.42931	1.37656	0.0669356	1.82021	1.69807	0.788129	0.785246	0.81066	1	1	1	1	1	1
Brevibacillus	0.0105671	0.0259068	0	3.2722	0.389475	1	0.650007	-1.06772	-1.71772	0.692402	-1.14079	-1.78933	0.938772	0.935943	0.959984	1	1	1	1	1	1
UG_Acetobacteraceae	0	0.0134255	0.0230339	4.26876	0.236636	1	1.41419	1.797	0.382815	1.52916	1.94907	0.404612	0.924813	0.921981	0.94613	1	1	1	1	1	1
UG_Solirubrobacteraceae	0.0187102	0.0120848	0.00557254	0.681922	0.577827	1	-0.264799	-0.836668	-0.571869	-0.256276	-0.811941	-0.542658	1.03326	1.03045	1.05383	1	1	1	1	1	1
Roseburia	0.0326326	0	0.00348303	4.31843	0.230831	1	-1.9214	-1.27577	0.645634	-2.03116	-1.35269	0.667583	0.945963	0.943137	0.967122	1	1	1	1	1	1
SAR202_clade	0.0122259	0.02388	0	2.80888	0.491008	1	0.358184	-1.20287	-1.56106	0.373688	-1.25864	-1.5936	0.958512	0.955689	0.97958	1	1	1	1	1	1
Dyella	0	0.0113809	0.0245799	3.09541	0.425471	1	0.94183	1.93216	0.990326	0.855419	1.75934	0.883277	1.10102	1.09823	1.1212	1	1	1	1	1	1
Geminicoccus	0.00729483	0.0171752	0.0112508	0.274465	0.256465	1	0.33039	0.624007	0.293617	0.27636	0.523172	0.241619	1.19551	1.19274	1.21521	1	1	1	1	1	1
UCG_Isosphaeraceae	0.0171537	0.00640178	0.0117831	0.440987	0.395754	1	-0.710634	-0.534588	0.176045	-0.633951	-0.478089	0.154286	1.12096	1.11818	1.14103	1	1	1	1	1	1
Irregularibacter	0.0106806	0.0205656	0.00398038	3.4576	0.354995	1	0.458219	-0.797407	-1.25563	0.693456	-1.21218	-1.8334	0.660776	0.657831	0.684863	1	1	1	1	1	1
Syntrophaceticus	0.0115327	0.0161331	0.00736395	0.993374	0.782913	1	0.399344	-0.230025	-0.629369	0.64977	-0.376091	-0.984324	0.614594	0.611621	0.639393	1	1	1	1	1	1
Subgroup_17	0.00977922	0.0162158	0.00808982	0.19777	0.188306	1	0.353967	-0.0434863	-0.397453	0.367406	-0.04527	-0.403729	0.963421	0.9606	0.984455	1	1	1	1	1	1
Candidatus_Kaiserbacteria	0.0149148	0.0133502	0.00557254	0.587492	0.509068	1	-0.0174865	-0.68525	-0.667763	-0.0173411	-0.68145	-0.648871	1.00839	1.00558	1.02912	1	1	1	1	1	1
UG_Rhizobiales	0.0175205	0.00949509	0.00666734	0.0460647	0.0455383	1	-0.0661378	-0.204295	-0.138157	-0.0682441	-0.211416	-0.139535	0.969136	0.966316	0.990129	1	1	1	1	1	1
Dethiobacter	0.00814307	0.0115507	0.0139255	0.0936128	0.0914557	1	0.213563	-0.0911866	-0.304749	0.213023	-0.091212	-0.29781	1.00253	0.999722	1.0233	1	1	1	1	1	1
Faecalibacterium	0.0221228	0.00711308	0.00428477	1.31287	0.962605	1	-0.910703	-1.10698	-0.196275	-0.876055	-1.06774	-0.18515	1.03955	1.03675	1.06008	1	1	1	1	1	1
UCG_Bacilli	0.0159033	0.0135628	0.00398038	1.10508	0.84903	1	0.692758	-0.318211	-1.01097	0.719293	-0.331371	-1.02726	0.96311	0.960289	0.984146	1	1	1	1	1	1
UCG_Christensenellaceae	0.0140704	0.00746748	0.011842	0.532967	0.467863	1	-0.61139	0.111282	0.722672	-0.583083	0.106414	0.67601	1.04855	1.04575	1.06903	1	1	1	1	1	1
AKYG587	0.00911248	0.01495	0.00916101	1.1877	0.895608	1	0.710781	0.103791	-0.60699	1.0264	0.150515	-0.847574	0.6925	0.689573	0.716149	1	1	1	1	1	1
Paucisalibacillus	0.00972644	0.0234669	0	2.2718	0.642266	1	0.852809	-0.701513	-1.55432	0.842641	-0.695078	-1.505	1.01207	1.00926	1.03277	1	1	1	1	1	1
UG_Microscillaceae	0.0122259	0.0103477	0.0103783	0.0130013	0.0129592	1	-0.0661378	-0.10426	-0.0381224	-0.0709885	-0.112248	-0.0400053	0.931669	0.928838	0.952934	1	1	1	1	1	1
Membranicola	0.0123699	0.0139756	0.00639788	0.328901	0.303281	1	0.128086	-0.386693	-0.514779	0.139739	-0.423181	-0.548809	0.916613	0.913777	0.937993	1	1	1	1	1	1
Thermincola	0.00894606	0.0211791	0.00238823	7.4674	0.0478084	1	1.09154	-0.617742	-1.70929	1.79245	-1.01939	-2.69663	0.608968	0.605992	0.633861	1	1	1	1	1	1
Candidatus_Uhrbacteria	0.0321328	0	0	91.9057	2.20786e-20	1.34458e-17	-2.44576	-2.3366	0.109155	-8.07837	-7.80358	0.323771	0.302754	0.299427	0.337137	6.56393e-16	6.01755e-15	0.746112	2.56831e-14	2.29435e-13	1
UCG_Proteinivoracales	0.00981691	0.0138969	0.00835928	0.0128702	0.0128288	1	0.113528	0.126789	0.0132611	0.0917723	0.102721	0.0105534	1.23706	1.2343	1.25657	1	1	1	1	1	1
Nitrosomonas	0.0189483	0.00796615	0.00487625	0.649832	0.554824	1	-0.444464	-0.797407	-0.352943	-0.44628	-0.802932	-0.347131	0.995932	0.99312	1.01674	1	1	1	1	1	1
Vicinamibacter	0.0182025	0	0.013346	3.82319	0.295688	1	-1.5552	-0.155644	1.39956	-1.80118	-0.180859	1.58097	0.863433	0.860579	0.88525	1	1	1	1	1	1
Puia	0.00572653	0.0114289	0.0139318	0.989984	0.780848	1	0.659397	0.955091	0.295694	0.666019	0.967431	0.292503	0.990058	0.987245	1.01091	1	1	1	1	1	1
UCG_Diplorickettsiaceae	0.0032723	0.0147773	0.0130183	9.60446	0.0164228	1	1.3473	1.21601	-0.131284	2.74728	2.4952	-0.253579	0.490411	0.48734	0.517726	1	1	1	1	1	1
Fimbriimonadaceae	0.00736269	0.0149301	0.00875685	0.549655	0.480594	1	0.785162	0.193679	-0.591483	0.716591	0.177215	-0.53005	1.09569	1.0929	1.1159	1	1	1	1	1	1
Rhodoplanes	0.00654461	0	0.0237535	3.76558	0.304331	1	-0.675513	1.11263	1.78814	-0.742089	1.2261	1.91919	0.910287	0.907449	0.931716	1	1	1	1	1	1
Labrys	0.00654461	0.0146905	0.00835928	0.485425	0.431006	1	0.750042	0.261944	-0.488098	0.689227	0.241324	-0.440328	1.08824	1.08545	1.10849	1	1	1	1	1	1
Aridibacter	0.00981691	0	0.0197439	2.97627	0.451587	1	-0.810669	0.865313	1.67598	-0.852791	0.912989	1.72474	0.950606	0.947781	0.971731	1	1	1	1	1	1
Solibacillus	0	0.00821423	0.0212661	3.35552	0.373584	1	0.816932	1.73888	0.921951	0.858003	1.83174	0.947294	0.952132	0.949307	0.973246	1	1	1	1	1	1
Caldilineaceae	0.00899884	0.0106822	0.0097525	0.160824	0.154528	1	0.447962	0.207176	-0.240786	0.400955	0.185899	-0.211711	1.11724	1.11446	1.13733	1	1	1	1	1	1
UG_Steroidobacteraceae	0.00730991	0.0121672	0.00983401	0.562968	0.490674	1	0.473726	0.515991	0.0422649	0.612545	0.669696	0.0530926	0.773373	0.770485	0.79606	1	1	1	1	1	1
Rhizocola	0.0231902	0	0.00557285	3.48964	0.349352	1	-1.74003	-0.93773	0.802302	-1.86296	-1.00703	0.839876	0.934016	0.931186	0.955263	1	1	1	1	1	1
mle1-27	0.00409038	0.0157676	0.00881538	4.06566	0.261928	1	1.32955	0.553767	-0.77578	2.01409	0.842644	-1.13382	0.660123	0.657178	0.684219	1	1	1	1	1	1
Lachnoclostridium	0.00981691	0	0.018509	2.76292	0.502424	1	-0.810669	0.859197	1.66987	-0.823908	0.875735	1.66185	0.983931	0.981115	1.00482	1	1	1	1	1	1
Sedimentibacter	0.0107676	0.0173121	0	11.0566	0.00794562	1	0.750042	-1.1191	-1.86914	1.38753	-2.08192	-3.29811	0.54056	0.537533	0.566732	1	1	1	1	1	1
UCG_Peptococcaceae	0.0121958	0.0102418	0.00535596	0.65465	0.558301	1	0.00402638	-0.640739	-0.644766	0.00444863	-0.710162	-0.695875	0.905083	0.902244	0.926554	1	1	1	1	1	1
UG_Elsterales	0	0.0160032	0.0117538	4.17596	0.247875	1	1.61346	1.28203	-0.33143	1.91701	1.52842	-0.383747	0.841658	0.838797	0.863669	1	1	1	1	1	1
Azoarcus	0.0140588	0.00373374	0.0098573	1.04476	0.813785	1	-0.871442	-0.188032	0.683411	-0.98114	-0.212381	0.751165	0.888194	0.885349	0.909801	1	1	1	1	1	1
Niastella	0.010635	0.0129534	0.00398038	0.512181	0.451856	1	0.527432	-0.191715	-0.719147	0.516423	-0.18823	-0.690184	1.02132	1.01851	1.04196	1	1	1	1	1	1
Neochlamydia	0.0090255	0.00887418	0.00935995	0.124907	0.121086	1	-0.0782603	0.066015	0.144275	-0.207142	0.176225	0.353055	0.37781	0.374607	0.408648	1	1	1	1	1	1
Microgenomatia	0.0099118	0.0172412	0	11.0571	0.00794347	1	0.794552	-1.05833	-1.85288	1.48966	-1.99555	-3.31049	0.533377	0.530344	0.5597	1	1	1	1	1	1
Methanobrevibacter	0.00745739	0.0114873	0.00806056	0.0983494	0.0959704	1	0.240243	0.238946	-0.00129722	0.26951	0.268912	-0.00142085	0.891409	0.888566	0.912991	1	1	1	1	1	1
Corynebacterium	0.0147785	0.00703075	0.00507519	1.43192	0.977447	1	-0.61139	-0.733283	-0.121894	-0.917136	-1.10486	-0.176496	0.666629	0.663688	0.690633	1	1	1	1	1	1
MBNT15	0.00409038	0.00437417	0.0180759	6.42034	0.0806997	1	0.213563	1.41719	1.20363	0.359551	2.39802	1.94409	0.59397	0.590984	0.61912	1	1	1	1	1	1
BD7-11	0.0236262	0.00284523	0	4.38641	0.223118	1	-1.29945	-1.65239	-0.352943	-1.54736	-1.97436	-0.409535	0.839786	0.836924	0.861814	1	1	1	1	1	1
Clostridium_sensu_stricto_7	0.0064843	0.00373374	0.0161796	1.32317	0.967937	1	-0.139034	0.910581	1.04961	-0.142416	0.93543	1.05256	0.976253	0.973435	0.997197	1	1	1	1	1	1
UG_Actinobacteriota	0.00162107	0.00868553	0.0160329	6.02302	0.0984345	1	0.554113	1.66185	1.10773	0.806116	2.42798	1.55776	0.687386	0.684456	0.711104	1	1	1	1	1	1
[Ruminococcus]_gnavus_group	0.0262393	0	0	66.3837	7.69105e-15	4.6454e-12	-2.20974	-2.10058	0.109155	-6.91011	-6.63717	0.309009	0.319783	0.316487	0.353243	4.8427e-12	3.19756e-11	0.757315	1.89484e-10	1.21916e-09	1
UG_Parachlamydiaceae	0.00163615	0.012557	0.0118949	1.89795	0.774275	1	1.12236	1.00647	-0.115888	1.24052	1.11594	-0.125119	0.904748	0.901909	0.926222	1	1	1	1	1	1
WX65	0.0115667	0.00711308	0.00719396	0.297178	0.276154	1	-0.505238	-0.260928	0.24431	-0.544496	-0.282063	0.257387	0.927901	0.925069	0.949195	1	1	1	1	1	1
Acetivibrio	0.0172861	0.0085357	0	2.31011	0.630081	1	-0.720891	-1.44004	-0.719147	-0.758349	-1.51938	-0.740068	0.950606	0.947781	0.971731	1	1	1	1	1	1
SJA-15	0.00409038	0.00560814	0.0160506	4.81754	0.179851	1	0.309457	1.37268	1.06322	0.476164	2.12179	1.57715	0.649895	0.646944	0.674141	1	1	1	1	1	1
Sporocytophaga	0.00655987	0.0133192	0.0053736	2.92101	0.464237	1	0.710781	-0.06914	-0.779921	1.46795	-0.143706	-1.52426	0.4842	0.481123	0.511671	1	1	1	1	1	1
Oxobacter	0.019778	0.00373374	0.00159215	13.7007	0.00211813	1	-1.50382	-1.70009	-0.196275	-2.92681	-3.32856	-0.363093	0.513808	0.510758	0.540564	0.00342463	0.000872955	0.716535	0.130573	0.0341567	1
Rummeliibacillus	0.00753315	0	0.0174438	7.75644	0.0413751	1	-0.714774	1.26052	1.9753	-1.02686	1.81854	2.7447	0.696075	0.69315	0.719677	1	1	1	1	1	1
Syntrophobacter	0.00324215	0.0135474	0.00814238	1.45913	0.964235	1	0.971701	0.663268	-0.308432	1.17393	0.80409	-0.362915	0.827734	0.824868	0.849875	1	1	1	1	1	1
Thermobacillus	0.0057532	0	0.0191647	27.3843	2.26259e-06	0.0013485	-0.810669	1.3213	2.13196	-2.12122	3.4865	5.16414	0.382171	0.378975	0.41284	0.0339036	0.000489386	2.41549e-07	1	0.0186591	9.45126e-06
Actinomycetospora	0.0106694	0.00874834	0.00535596	0.55536	0.484921	1	-0.0174865	-0.566358	-0.548872	-0.0205044	-0.666337	-0.627479	0.852815	0.849958	0.874726	1	1	1	1	1	1
Salinimicrobium	0.00334806	0.0102418	0.0111454	1.57261	0.911052	1	0.845936	1.00647	0.160539	0.970677	1.15868	0.179727	0.871491	0.868641	0.893239	1	1	1	1	1	1
Microbacterium	0.0064843	0.0126947	0.00535596	0.0915839	0.0895187	1	0.268891	-0.029879	-0.29877	0.251028	-0.027967	-0.273723	1.07116	1.06837	1.09151	1	1	1	1	1	1
JCM_18997	0	0.00957	0.0144118	4.06795	0.261629	1	1.20275	1.51825	0.315502	1.49704	1.89652	0.382057	0.803421	0.800545	0.825798	1	1	1	1	1	1
UG_Acidobacteriota	0.0183349	0.00547085	0	2.24419	0.651195	1	-0.562522	-1.22089	-0.658373	-0.687744	-1.49793	-0.783631	0.817923	0.815052	0.840157	1	1	1	1	1	1
Parcubacteria	0.0123206	0.00426785	0.00719396	2.31183	0.629538	1	-0.980944	-0.566358	0.414585	-1.5067	-0.873871	0.613944	0.651053	0.648103	0.675282	1	1	1	1	1	1
Segetibacter	0	0.0172571	0.00642715	9.72098	0.0154934	1	1.90529	0.724042	-1.18125	3.10707	1.18649	-1.85139	0.613211	0.610237	0.638033	1	1	1	1	1	1
Methylobacterium-Methylorubrum	0.0122791	0.00579679	0.00557285	0.687275	0.581628	1	-0.505238	-0.605619	-0.100381	-0.637619	-0.767091	-0.123187	0.792382	0.789502	0.81487	1	1	1	1	1	1
Candidatus_Koribacter	0.0121882	0	0.0114495	3.31126	0.381944	1	-1.24376	0.0598986	1.30366	-1.56986	0.075879	1.60004	0.792278	0.789397	0.814767	1	1	1	1	1	1
Methylocaldum	0.00245423	0.00607987	0.0149381	1.93561	0.759831	1	0.300066	1.14688	0.846813	0.352785	1.35292	0.970564	0.850565	0.847707	0.872495	1	1	1	1	1	1
Desulfofarcimen	0.0195584	0.00387103	0	4.41876	0.219538	1	-1.03233	-1.52043	-0.488098	-1.38337	-2.04539	-0.634527	0.746243	0.743343	0.769232	1	1	1	1	1	1
UG_Clostridiaceae	0	0.019418	0.00398038	3.57976	0.33396	1	1.62973	0.663268	-0.96646	1.887	0.770519	-1.09146	0.86366	0.860807	0.885475	1	1	1	1	1	1
Angustibacter	0.0138093	0	0.00905589	2.01268	0.731109	1	-1.29945	-0.335309	0.964138	-1.37742	-0.356498	0.999553	0.943391	0.940564	0.964569	1	1	1	1	1	1
Streptosporangium	0.0204902	0.00213393	0	40.7371	2.85153e-09	1.71092e-06	-1.71335	-1.9704	-0.257049	-4.90832	-5.69769	-0.674462	0.349071	0.345824	0.381117	9.18581e-07	1.2144e-08	0.500017	3.50234e-05	4.75166e-07	1
UG_Pirellulaceae	0.0108812	0	0.0114262	4.21118	0.243548	1	-0.837349	0.710968	1.54832	-1.14376	0.975006	2.05006	0.732101	0.729194	0.755254	1	1	1	1	1	1
UCG_Pedosphaeraceae	0.00654461	0.0157237	0	2.23512	0.654154	1	0.785162	-0.566358	-1.35152	0.885893	-0.641076	-1.48859	0.886295	0.883449	0.907918	1	1	1	1	1	1
Lactobacillus	0.00409038	0.0160308	0.00214238	1.40508	0.990651	1	0.771555	-0.178641	-0.950196	0.926607	-0.215282	-1.11165	0.832667	0.829802	0.854761	1	1	1	1	1	1
Herpetosiphon	0.00981691	0.00173711	0.010355	2.70927	0.516084	1	-0.579619	0.663268	1.24289	-0.791046	0.908813	1.64431	0.732725	0.729818	0.755871	1	1	1	1	1	1
Sphingobium	0	0.0135824	0.00799004	2.6754	0.524896	1	1.12837	1.09025	-0.0381224	1.42304	1.37998	-0.0467525	0.792926	0.790046	0.815409	1	1	1	1	1	1
Sneathiella	0.0122033	0.00448049	0.00487625	0.665993	0.566454	1	-0.714774	-0.554236	0.160539	-0.771712	-0.600221	0.169429	0.926219	0.923387	0.947526	1	1	1	1	1	1
UCG_Caulobacteraceae	0.0114078	0	0.0101032	2.98122	0.450471	1	-1.27277	-0.165034	1.10773	-1.61193	-0.209778	1.36402	0.78959	0.786708	0.812106	1	1	1	1	1	1
Fonticella	0.00731745	0.00142262	0.0122748	2.40167	0.601885	1	-0.714774	0.409221	1.124	-1.00521	0.57787	1.53032	0.711073	0.708155	0.734483	1	1	1	1	1	1
UCG_Chitinophagales	0.0189601	0.00173711	0	5.64862	0.118699	1	-1.37892	-1.50081	-0.121894	-1.93821	-2.11823	-0.165877	0.711438	0.708521	0.734844	1	1	1	1	1	1
Entotheonellaceae	0.00486322	0.00892511	0.00636862	0.346909	0.318489	1	0.531115	0.222683	-0.308432	0.587897	0.247267	-0.333477	0.903415	0.900575	0.924899	1	1	1	1	1	1
Legionella	0.00572653	0.00545089	0.0089561	0.708475	0.596583	1	0.197299	0.672658	0.475359	0.241142	0.825028	0.565623	0.818186	0.815315	0.840417	1	1	1	1	1	1
211ds20	0.0041472	0.00736116	0.00856953	0.300538	0.279047	1	0.435221	0.222683	-0.212538	0.547532	0.281166	-0.260036	0.794879	0.791999	0.817341	1	1	1	1	1	1
UCG_Euzebyaceae	0.00243161	0.00298699	0.0142652	8.60374	0.0270864	1	0.113528	1.4078	1.29427	0.217837	2.71714	2.36288	0.52116	0.518117	0.54775	1	1	1	1	1	1
Elev-16S-573	0.011548	0.00640178	0.00159215	2.26405	0.644758	1	-0.666123	-1.05833	-0.392204	-0.927808	-1.4801	-0.529091	0.717954	0.71504	0.741279	1	1	1	1	1	1
Latescibacteraceae	0.0115064	0.00640178	0.00139321	1.25402	0.931625	1	-0.540358	-0.932562	-0.392204	-0.64206	-1.11186	-0.454143	0.841601	0.83874	0.863613	1	1	1	1	1	1
Burkholderia-Caballeronia-Paraburkholderia	0.00405268	0.00597398	0.00906123	0.603659	0.521072	1	0.174302	0.649661	0.475359	0.202352	0.756717	0.538215	0.86138	0.858526	0.883215	1	1	1	1	1	1
Desulfosporosinus	0.0089536	0.00694843	0.00278643	0.469123	0.418165	1	-0.422952	-0.544845	-0.121894	-0.501327	-0.648006	-0.140811	0.843664	0.840803	0.865657	1	1	1	1	1	1
Patulibacter	0.0141535	0.00426785	0	2.28555	0.637864	1	-0.702194	-1.19029	-0.488098	-0.88078	-1.49842	-0.595474	0.797241	0.794363	0.81968	1	1	1	1	1	1
UCG_Limnochordales	0.00490846	0.00458234	0.00856953	0.0716932	0.0704235	1	0.113528	0.222683	0.109155	0.135921	0.267525	0.127322	0.835245	0.832382	0.857315	1	1	1	1	1	1
Haloplasma	0.00572653	0.0059031	0.00632202	0.145229	0.140081	1	0.197299	0.306454	0.109155	0.240038	0.374144	0.129309	0.821949	0.819081	0.844145	1	1	1	1	1	1
FFCH7168	0.00734007	0.0103477	0	2.79063	0.49551	1	0.300066	-0.836668	-1.13673	0.438083	-1.22675	-1.60397	0.684953	0.682021	0.708703	1	1	1	1	1	1
Acidothermus	0.00572653	0.00947917	0.00238823	0.852223	0.693913	1	0.563503	-0.155644	-0.719147	0.704785	-0.19537	-0.874923	0.79954	0.796662	0.821955	1	1	1	1	1	1
type_III	0.0105822	0.00671626	0	2.5773	0.551285	1	-0.34857	-1.1191	-0.770531	-0.490614	-1.58163	-1.04992	0.710478	0.707561	0.733896	1	1	1	1	1	1
Saccharopolyspora	0	0.0087129	0.00855822	3.19982	0.403829	1	1.20275	1.12537	-0.0773834	1.57822	1.48231	-0.0985898	0.762093	0.7592	0.784903	1	1	1	1	1	1
Methanoculleus	0.00245423	0.00979366	0.00477646	1.07239	0.830059	1	0.806675	0.357838	-0.448837	1.0352	0.460918	-0.559738	0.779245	0.776359	0.80187	1	1	1	1	1	1
Actinocorallia	0	0.00861062	0.0082595	4.37488	0.224407	1	1.15137	1.26052	0.109155	1.69826	1.86735	0.155533	0.677969	0.675034	0.701814	1	1	1	1	1	1
UG_Oscillospiraceae	0.00163615	0.00142262	0.0131178	11.25	0.0072132	1	0.0176337	1.35642	1.33878	0.0392952	3.04378	2.80558	0.448749	0.445635	0.477186	1	1	1	1	1	1
OM190	0.00409038	0.00947917	0.00238823	1.13172	0.864257	1	0.675661	-0.0434863	-0.719147	0.912151	-0.0589382	-0.941557	0.740733	0.73783	0.763785	1	1	1	1	1	1
UG_Anaerolineae	0.00985112	0.00600496	0	6.16663	0.0916145	1	-0.483725	-1.20287	-0.719147	-0.991394	-2.48091	-1.39559	0.487925	0.484851	0.515301	1	1	1	1	1	1
Candidatus_Amoebophilus	0.0108055	0	0.00487625	2.40348	0.601343	1	-1.17687	-0.419081	0.757792	-1.53838	-0.54989	0.961924	0.76501	0.762118	0.787788	1	1	1	1	1	1
UCG_Rhodospirillaceae	0	0.00521132	0.0104075	3.32717	0.378917	1	0.614887	1.26052	0.645634	0.885741	1.82346	0.899421	0.694206	0.69128	0.717833	1	1	1	1	1	1
Cupriavidus	0.0123848	0	0.00318431	3.6819	0.317333	1	-1.31203	-0.740774	0.571253	-1.90568	-1.08055	0.802114	0.688482	0.685553	0.712185	1	1	1	1	1	1
1959-01-01	0.00162107	0.00892511	0.00477646	1.54683	0.922869	1	0.897319	0.492993	-0.404327	1.23784	0.68282	-0.540438	0.724906	0.721995	0.748145	1	1	1	1	1	1
Pelagibius	0	0.00821423	0.00674917	1.6744	0.86584	1	0.816932	0.894317	0.0773851	1.05333	1.15742	0.0969452	0.775572	0.772684	0.798235	1	1	1	1	1	1
Sva0996_marine_group	0	0.0115581	0.00321357	4.13086	0.253528	1	1.35341	0.492993	-0.860418	2.02081	0.739345	-1.24034	0.669736	0.666797	0.693696	1	1	1	1	1	1
Atopostipes	0.00732499	0	0.00744578	3.62804	0.325995	1	-0.980944	0.0308948	1.01184	-1.67328	0.0529705	1.65461	0.586239	0.583246	0.611526	1	1	1	1	1	1
UG_Peptostreptococcales-Tissierellales	0.00418508	0.00807247	0.00214238	1.27914	0.944963	1	0.591889	-0.178641	-0.770531	0.855709	-0.259364	-1.07713	0.691695	0.688767	0.715355	1	1	1	1	1	1
LD29	0.00920718	0.00298699	0.00208982	0.193714	0.184629	1	-0.319567	-0.306305	0.0132611	-0.384632	-0.369947	0.0155474	0.830836	0.827971	0.852948	1	1	1	1	1	1
Candidatus_Protochlamydia	0.0107753	0	0.00318431	3.13324	0.4175	1	-1.17687	-0.605619	0.571253	-1.76659	-0.913119	0.827671	0.666184	0.663242	0.690194	1	1	1	1	1	1
Desulfovirga	0.00831334	0	0.00517466	3.34709	0.375162	1	-0.997207	-0.0597497	0.937457	-1.67315	-0.100755	1.5093	0.596006	0.59302	0.62112	1	1	1	1	1	1
UCG_Magnetospiraceae	0.0113626	0	0.00208982	2.26699	0.643812	1	-1.04172	-0.566358	0.475359	-1.49913	-0.818487	0.661598	0.694883	0.691957	0.718501	1	1	1	1	1	1
Syntrophomonas	0.00405268	0.00433873	0.00487625	0.10233	0.0997561	1	0.174302	0.238946	0.0646447	0.223156	0.307054	0.0804359	0.781074	0.778189	0.803679	1	1	1	1	1	1
Chitinophaga	0	0.0102064	0.00278643	3.84193	0.292931	1	1.31491	0.588887	-0.72602	1.95992	0.881621	-1.04487	0.670898	0.667959	0.694841	1	1	1	1	1	1
possible_genus_04	0.0057532	0	0.00716501	2.80382	0.492253	1	-0.810669	0.222683	1.03335	-1.29171	0.356503	1.58445	0.627595	0.624631	0.652184	1	1	1	1	1	1
Roseovarius	0	0.00732572	0.00535596	2.88945	0.471621	1	1.07698	0.663268	-0.413717	1.67303	1.0351	-0.619269	0.643734	0.640779	0.668073	1	1	1	1	1	1
UG_Chitinophagales	0.00243161	0.00434277	0.00587692	0.502786	0.444567	1	0.187909	0.453732	0.265823	0.291905	0.708094	0.397895	0.643734	0.640779	0.668073	1	1	1	1	1	1
Gelidibacter	0.00572653	0.00448049	0.00238823	0.0413192	0.0408953	1	-0.0337499	-0.155644	-0.121894	-0.0422116	-0.19537	-0.148298	0.79954	0.796662	0.821955	1	1	1	1	1	1
Dinghuibacter	0	0.00260566	0.00988657	4.12474	0.254304	1	0.383838	1.14163	0.757792	0.673503	2.01378	1.27253	0.569913	0.566909	0.595501	1	1	1	1	1	1
Dietzia	0	0.00448049	0.00786162	2.21254	0.66158	1	0.614887	1.09025	0.475359	0.830794	1.47887	0.622868	0.740119	0.737216	0.763178	1	1	1	1	1	1
Monoglobus	0.00993055	0.00224024	0	3.64758	0.322826	1	-0.810669	-1.06772	-0.257049	-1.36666	-1.80911	-0.415708	0.593177	0.59019	0.61834	1	1	1	1	1	1
Nitrococcus	0.0107108	0	0.00139321	4.50493	0.21028	1	-1.17687	-0.836668	0.340204	-2.03617	-1.45511	0.563792	0.577984	0.574986	0.603421	1	1	1	1	1	1
Sulfurifustis	0.00163615	0.0048459	0.00557254	0.901462	0.725675	1	0.518993	0.544377	0.0253837	0.789357	0.831691	0.0372401	0.657488	0.654541	0.681623	1	1	1	1	1	1
UCG_Ktedonobacteraceae	0.00409038	0.0079547	0	2.03544	0.722837	1	0.540506	-0.40969	-0.950196	0.839641	-0.639363	-1.42229	0.643734	0.640779	0.668073	1	1	1	1	1	1
UCG_Phycisphaeraceae	0.00902182	0.00142262	0.00159215	2.87431	0.475206	1	-0.862052	-0.752897	0.109155	-1.52904	-1.3426	0.185169	0.563785	0.560777	0.589491	1	1	1	1	1	1
Parafilimonas	0.00654461	0.00260566	0.00278643	0.167785	0.160939	1	-0.309309	-0.10426	0.205049	-0.405301	-0.137136	0.260891	0.76316	0.760267	0.785958	1	1	1	1	1	1
Christensenellaceae_R-7_group	0.00744231	0.00213393	0.00214238	2.67921	0.523899	1	-0.61474	-0.640739	-0.0259999	-1.35068	-1.41749	-0.0537871	0.455132	0.452025	0.483385	1	1	1	1	1	1
Sideroxydans	0	0.0116685	0	79.3639	1.16784e-17	7.10049e-15	1.61346	0.126789	-1.48668	8.82504	0.707269	-6.5526	0.182828	0.179265	0.226883	1.09424e-18	0.479399	5.65429e-11	4.28152e-17	1	2.15585e-09
Chthonomonadales	0.00405268	0.00758482	0	1.77875	0.821826	1	0.495995	-0.40969	-0.905686	0.756241	-0.627472	-1.33184	0.65587	0.652922	0.680028	1	1	1	1	1	1
UCG_Polyangiales	0	0.0115976	0	79.3639	1.16784e-17	7.10049e-15	1.61346	0.126789	-1.48668	8.82504	0.707269	-6.5526	0.182828	0.179265	0.226883	1.09424e-18	0.479399	5.65429e-11	4.28152e-17	1	2.15585e-09
Pelotomaculum	0.00245423	0.00355654	0.00557254	0.284894	0.265533	1	0.187909	0.409221	0.221313	0.244155	0.533716	0.279309	0.76963	0.76674	0.792358	1	1	1	1	1	1
Confluentibacter	0.00418508	0.00512092	0.00208982	0.327087	0.301741	1	0.309457	-0.0434863	-0.352943	0.47363	-0.0668585	-0.520897	0.653372	0.650423	0.677567	1	1	1	1	1	1
UCG_Lachnospiraceae	0	0.0032306	0.00814238	5.69939	0.115724	1	0.479732	1.12537	0.645634	1.01098	2.3871	1.2855	0.474523	0.471436	0.502245	1	1	1	1	1	1
D05-2	0.00486322	0.00298699	0.00348303	0.0541853	0.0534579	1	-0.117521	0.066015	0.183536	-0.151363	0.085342	0.229685	0.776422	0.773535	0.799077	1	1	1	1	1	1
Tolypothrix	0	0.00708615	0.00417964	2.3713	0.611096	1	0.981091	0.724042	-0.257049	1.46845	1.0885	-0.371407	0.668114	0.665173	0.692096	1	1	1	1	1	1
27F-1492R	0.00893852	0.00213393	0	2.69896	0.51875	1	-0.675513	-0.932562	-0.257049	-1.13438	-1.57392	-0.414183	0.595494	0.592508	0.620617	1	1	1	1	1	1
UG_Myxococcota	0.00730991	0	0.00348303	1.80267	0.812053	1	-0.862052	-0.216418	0.645634	-1.30717	-0.329635	0.94448	0.659482	0.656536	0.683587	1	1	1	1	1	1
UCG_Geobacteraceae	0.00486322	0.00213393	0.00378144	0.260393	0.244154	1	-0.213415	0.126789	0.340204	-0.328389	0.195984	0.504655	0.649887	0.646936	0.674133	1	1	1	1	1	1
Candidatus_Ovatusbacter	0	0	0.0105306	102.475	1.11884e-22	6.83613e-20	0.0176337	1.49157	1.47394	0.116262	10.0678	7.39254	0.151672	0.148153	0.199382	0.907445	7.66736e-24	1.44046e-13	1	3.00006e-22	5.49212e-12
Mucilaginibacter	0.00405268	0.0014935	0.00487625	0.486562	0.431898	1	-0.287797	0.238946	0.526743	-0.392627	0.327281	0.696617	0.733001	0.730095	0.756144	1	1	1	1	1	1
Hassallia	0	0.00284523	0.00746907	3.62479	0.326525	1	0.479732	1.05099	0.571253	0.864315	1.90386	0.98336	0.555043	0.552028	0.58092	1	1	1	1	1	1
Ruminococcus	0.00167403	0.0064612	0.00214238	2.3328	0.622974	1	0.710781	0.126789	-0.583992	1.46782	0.263504	-1.14125	0.484242	0.481165	0.511712	1	1	1	1	1	1
UCG_Family_XI	0.00251105	0.00426785	0.00321357	0.139839	0.135062	1	0.248683	0.126789	-0.121894	0.37333	0.191184	-0.176624	0.66612	0.663178	0.690131	1	1	1	1	1	1
UA11	0.00409038	0.00347421	0.00238823	0.00800406	0.00798807	1	-0.0567475	-0.0434863	0.0132611	-0.0845082	-0.0650444	0.0190688	0.671502	0.668564	0.695437	1	1	1	1	1	1
Sporobacter	0.00745371	0.00213393	0	2.58568	0.548981	1	-0.579619	-0.836668	-0.257049	-1.06949	-1.55245	-0.452469	0.54196	0.538934	0.568103	1	1	1	1	1	1
Bradymonadaceae	0.00815061	0	0.00139321	4.57932	0.202602	1	-1.04172	-0.701513	0.340204	-2.06955	-1.40219	0.641465	0.503356	0.500297	0.530355	1	1	1	1	1	1
UG_Proteobacteria	0.00490846	0.00458234	0	0.973759	0.770918	1	0.113528	-0.470464	-0.583992	0.186708	-0.777535	-0.922641	0.608049	0.605072	0.632957	1	1	1	1	1	1
UCG_Micavibrionales	0.00163615	0.00298699	0.00477646	0.554922	0.48459	1	0.248683	0.492993	0.24431	0.373703	0.744124	0.354342	0.665456	0.662514	0.689476	1	1	1	1	1	1
Ferrovibrio	0	0.00496771	0.00398038	2.03366	0.723481	1	0.710781	0.663268	-0.0475127	1.25175	1.17429	-0.0800606	0.567832	0.564826	0.59346	1	1	1	1	1	1
Pla4_lineage	0.0032723	0.0014935	0.00417964	0.477476	0.424757	1	-0.213415	0.261944	0.475359	-0.320705	0.395379	0.68945	0.665456	0.662514	0.689476	1	1	1	1	1	1
Clostridium_sensu_stricto_18	0	0.00224024	0.00669661	4.12687	0.254033	1	0.383838	1.02947	0.645634	0.750478	2.0249	1.19947	0.511458	0.508406	0.538268	1	1	1	1	1	1
Sporomusa	0	0.00434277	0.00447805	2.56462	0.554793	1	0.554113	0.859197	0.305084	1.00412	1.56553	0.528026	0.551841	0.548823	0.577782	1	1	1	1	1	1
Defluviicoccus	0	0.00647669	0.00214238	4.12374	0.254431	1	0.920317	0.357838	-0.562479	2.02868	0.794232	-1.16709	0.453654	0.450546	0.481949	1	1	1	1	1	1
UCG_Paracaedibacteraceae	0.00245423	0.00173711	0.00428477	0.37686	0.343483	1	-0.117521	0.222683	0.340204	-0.218174	0.415739	0.602269	0.53866	0.535631	0.564871	1	1	1	1	1	1
Dyadobacter	0.00490846	0.00142262	0.00208982	0.322465	0.297812	1	-0.34857	-0.10426	0.24431	-0.559264	-0.16808	0.377066	0.623267	0.620299	0.647924	1	1	1	1	1	1
UG_Opitutaceae	0.00162107	0.00497916	0.00159215	0.519358	0.457402	1	0.435221	0.126789	-0.308432	0.708812	0.207496	-0.482814	0.614015	0.611042	0.638823	1	1	1	1	1	1
UG_Opitutales	0.00651445	0.0014935	0	3.9425	0.278565	1	-0.675513	-0.797407	-0.121894	-1.51987	-1.8068	-0.257694	0.444455	0.441336	0.473018	1	1	1	1	1	1
Pelosinus	0.00334806	0.00224024	0.00214238	0.0421313	0.0416907	1	-0.0782603	-0.10426	-0.0259999	-0.145287	-0.194649	-0.046028	0.53866	0.535631	0.564871	1	1	1	1	1	1
Candidatus_Berkiella	0.00405268	0.00362742	0	0.903119	0.726731	1	0.0784076	-0.40969	-0.488098	0.147379	-0.774492	-0.874154	0.532014	0.52898	0.558366	1	1	1	1	1	1
UG_Geobacteraceae	0.00324215	0.00437417	0	1.38505	0.999375	1	0.287944	-0.335309	-0.623253	0.572049	-0.670221	-1.17516	0.503356	0.500297	0.530355	1	1	1	1	1	1
UG_Bacteroidia	0.00162107	0.00437417	0.00159215	1.55912	0.917215	1	0.518993	0.126789	-0.392204	1.22512	0.301531	-0.86611	0.423627	0.420484	0.452834	1	1	1	1	1	1
UG_Thermoactinomycetaceae	0	0.00142262	0.00607021	5.45732	0.130614	1	0.248683	1.02947	0.780789	0.548177	2.28494	1.62007	0.453654	0.450546	0.481949	1	1	1	1	1	1
UG_Chthoniobacteraceae	0	0	0.00727013	26.1747	4.14249e-06	0.00246478	0.0176337	1.05099	1.03335	0.0813543	4.92854	4.01505	0.216752	0.213245	0.25737	0.93516	8.28477e-07	5.9434e-05	1	3.24164e-05	0.00226608
Pseudonocardiaceae	0	0.00213393	0.00453061	3.04939	0.435375	1	0.383838	0.724042	0.340204	0.912977	1.73516	0.756455	0.420424	0.417278	0.449735	1	1	1	1	1	1
UCG_Simkaniaceae	0.00491618	0.00173711	0	2.35171	0.617111	1	-0.444464	-0.566358	-0.121894	-1.10965	-1.42525	-0.283123	0.400546	0.397374	0.430534	1	1	1	1	1	1
Izemoplasmatales	0.00243161	0.00397735	0	1.1779	0.890178	1	0.248683	-0.239415	-0.488098	0.591504	-0.573755	-1.0853	0.420424	0.417278	0.449735	1	1	1	1	1	1
Methanosphaera	0	0.0014935	0.00480573	4.45477	0.21562	1	0.248683	0.724042	0.475359	0.716745	2.10654	1.25391	0.346961	0.343712	0.379103	1	1	1	1	1	1
UG_Gallionellaceae	0.00162107	0.00173711	0.00208982	0.448613	0.401859	1	0.0176337	0.261944	0.24431	0.0416255	0.622958	0.539514	0.423627	0.420484	0.452834	1	1	1	1	1	1
UCG_Oscillospiraceae	0.00329511	0	0.00214238	2.35657	0.615612	1	-0.444464	-0.10426	0.340204	-1.52066	-0.36084	1.0395	0.292284	0.288937	0.327277	1	1	1	1	1	1
1 UG, Unclassified genus; UCG, Uncultured genus
